# Supplementary material
Source: publisher site journal article supplement (https://www.spandidos-publications.com/2966/downloadSupplementary)
Supplement: Supplementary file 1 [file downloadSupplementary]

## Sheet: 2VS0-adj.P.value<0.05-|logFC|>1
The list of DEGS in COs cultured for 2 days with calcified medium
Gene.symbol	Gene name	logFC	adj.P.Val
PSAT1	phosphoserine aminotransferase 1	-2.98	1.69e-07
IL6	interleukin 6	-2.83	1.69e-07
PHGDH	phosphoglycerate dehydrogenase	-2.76	3.99e-07
CXCL12	C-X-C motif chemokine ligand 12	-2.57	2.3e-06
IER3	immediate early response 3	-2.38	9.52e-07
NRG1	neuregulin 1	-2.37	5.08e-07
APCDD1L	APC down-regulated 1 like	-2.31	1.98e-07
NTM	neurotrimin	-2.18	9.52e-07
FST	follistatin	-2.16	1.7e-07
IGFBP5	insulin like growth factor binding protein 5	-2.15	8.4e-07
ASNS	asparagine synthetase (glutamine-hydrolyzing)	-2.11	6.18e-05
FLG	filaggrin	-2.08	5.83e-06
SLC7A5	solute carrier family 7 member 5	-2.08	1.57e-05
BHLHE40	basic helix-loop-helix family member e40	-2.05	6.41e-07
THBS2	thrombospondin 2	-2.05	9.54e-06
KRT19	keratin 19	-2.01	3.36e-06
TNC	tenascin C	-1.98	4.19e-05
TUBB3	tubulin beta 3 class III	-1.82	8.82e-07
LPXN	leupaxin	-1.81	8.84e-06
LDB2	LIM domain binding 2	-1.8	3.08e-06
CCL2	C-C motif chemokine ligand 2	-1.79	0.000194
MALL	mal, T-cell differentiation protein like	-1.75	8.01e-06
TM4SF1	transmembrane 4 L six family member 1	-1.74	5.9e-06
SHISA2	shisa family member 2	-1.72	3.45e-06
EGR1	early growth response 1	-1.7	1.09e-05
FOXD1	forkhead box D1	-1.65	5.4e-06
CTSL	cathepsin L	-1.64	1.03e-05
PODXL	podocalyxin like	-1.62	8.4e-07
CD44	CD44 molecule (Indian blood group)	-1.59	1.27e-05
C11orf87	chromosome 11 open reading frame 87	-1.59	2.19e-05
NGF	nerve growth factor	-1.58	2.95e-06
PLAU	plasminogen activator, urokinase	-1.56	2.24e-06
HAS2	hyaluronan synthase 2	-1.56	0.000186
NMB	neuromedin B	-1.47	9.52e-07
ID2	inhibitor of DNA binding 2, HLH protein	-1.46	6.42e-06
PHLDA1	pleckstrin homology like domain family A member 1	-1.46	6.91e-06
FNDC1	fibronectin type III domain containing 1	-1.44	6.38e-06
DPYSL3	dihydropyrimidinase like 3	-1.43	6.14e-05
RAB27B	RAB27B, member RAS oncogene family	-1.42	4.91e-06
CRABP2	cellular retinoic acid binding protein 2	-1.42	6.85e-06
GPR68	G protein-coupled receptor 68	-1.42	1.07e-05
CLDN11	claudin 11	-1.41	0.000945
ABI3BP	ABI family member 3 binding protein	-1.4	0.000284
JUN	Jun proto-oncogene, AP-1 transcription factor subunit	-1.39	0.00013
SGK1	serum/glucocorticoid regulated kinase 1	-1.38	8.84e-06
EXT1	exostosin glycosyltransferase 1	-1.38	2.12e-05
SMYD3	SET and MYND domain containing 3	-1.36	1.34e-05
RGMB	repulsive guidance molecule family member b	-1.33	9.79e-06
FAM129A	family with sequence similarity 129 member A	-1.31	2.15e-05
IGFBP3	insulin like growth factor binding protein 3	-1.31	0.00259
GJA1	gap junction protein alpha 1	-1.3	0.00107
ENPP2	ectonucleotide pyrophosphatase/phosphodiesterase 2	-1.29	0.000122
KRT34	keratin 34	-1.28	6.89e-05
COL6A1	collagen type VI alpha 1 chain	-1.27	0.000517
CPA4	carboxypeptidase A4	-1.26	5.34e-05
GDF15	growth differentiation factor 15	-1.25	0.000244
ZMIZ1	zinc finger MIZ-type containing 1	-1.24	0.000102
PLAT	plasminogen activator, tissue type	-1.23	7.21e-05
ALPK2	alpha kinase 2	-1.22	0.000151
CBLB	Cbl proto-oncogene B	-1.22	0.00111
PRKCA	protein kinase C alpha	-1.19	0.000128
TMEM200A	transmembrane protein 200A	-1.18	4.14e-06
HBEGF	heparin binding EGF like growth factor	-1.18	6.01e-05
ADAMTS1	ADAM metallopeptidase with thrombospondin type 1 motif 1	-1.18	0.0103
MAFB	MAF bZIP transcription factor B	-1.17	1.15e-05
HEG1	heart development protein with EGF like domains 1	-1.17	0.000128
PLAUR	plasminogen activator, urokinase receptor	-1.16	1.75e-05
SPHK1	sphingosine kinase 1	-1.16	0.000151
PCK2	phosphoenolpyruvate carboxykinase 2, mitochondrial	-1.15	3.02e-05
MARCKSL1	MARCKS like 1	-1.15	3.94e-05
GREM1	gremlin 1, DAN family BMP antagonist	-1.15	0.00124
FOXQ1	forkhead box Q1	-1.14	1.86e-05
SQSTM1	sequestosome 1	-1.14	0.00656
P4HA2	prolyl 4-hydroxylase subunit alpha 2	-1.12	4.77e-05
CA12	carbonic anhydrase 12	-1.12	0.000128
COL6A2	collagen type VI alpha 2 chain	-1.11	0.0009
APOE	apolipoprotein E	-1.1	6.01e-05
INSIG1	insulin induced gene 1	-1.1	0.00186
PITHD1	PITH domain containing 1	-1.09	1.72e-05
HMOX1	heme oxygenase 1	-1.09	0.00765
ABL1	ABL proto-oncogene 1, non-receptor tyrosine kinase	-1.08	0.000422
RGS4	regulator of G-protein signaling 4	-1.08	0.00129
COL5A1	collagen type V alpha 1 chain	-1.06	0.000171
PRNP	prion protein	-1.06	0.000219
C11orf96	chromosome 11 open reading frame 96	-1.06	0.000248
ENC1	ectodermal-neural cortex 1	-1.06	0.000345
LMO4	LIM domain only 4	-1.06	0.000555
ARHGAP22	Rho GTPase activating protein 22	-1.06	0.000844
KCNMA1	potassium calcium-activated channel subfamily M alpha 1	-1.05	5.57e-05
TENM3	teneurin transmembrane protein 3	-1.05	0.000244
ESM1	endothelial cell specific molecule 1	-1.04	1.44e-05
FAM198B	family with sequence similarity 198 member B	-1.04	2.03e-05
FRMD6	FERM domain containing 6	-1.04	2.23e-05
CSRNP1	cysteine and serine rich nuclear protein 1	-1.04	3.94e-05
VEGFC	vascular endothelial growth factor C	-1.03	1.65e-05
ALDH1A3	aldehyde dehydrogenase 1 family member A3	-1.03	0.000156
CALB2	calbindin 2	-1.02	5.57e-05
SERTAD2	SERTA domain containing 2	-1.02	0.00036
TSKU	tsukushi, small leucine rich proteoglycan	-1.01	8.93e-06
ANXA2	annexin A2	1.01	0.000452
CKB	creatine kinase B	1.01	0.000536
PDGFD	platelet derived growth factor D	1.02	3.21e-06
DUSP5	dual specificity phosphatase 5	1.03	5.86e-05
DCLK1	doublecortin like kinase 1	1.03	0.000457
USP53	ubiquitin specific peptidase 53	1.04	6.53e-06
LHFP	lipoma HMGIC fusion partner	1.04	7.59e-05
GAS6	growth arrest specific 6	1.04	0.000127
ACTA2	actin, alpha 2, smooth muscle, aorta	1.04	0.00259
GLS	glutaminase	1.05	2.15e-05
TCEAL3	transcription elongation factor A like 3	1.05	4.55e-05
FAM46B	family with sequence similarity 46 member B	1.05	7.34e-05
EFNB2	ephrin B2	1.05	7.59e-05
FOXO1	forkhead box O1	1.05	0.000466
NPAS1	neuronal PAS domain protein 1	1.05	0.00155
FZD4	frizzled class receptor 4	1.06	5.03e-05
PYGB	phosphorylase, glycogen; brain	1.06	0.00337
NFKBIA	NFKB inhibitor alpha	1.07	0.000399
ELL2	elongation factor for RNA polymerase II 2	1.08	9.83e-06
OMD	osteomodulin	1.08	5.34e-05
OPN3	opsin 3	1.09	0.000289
IGFBP2	insulin like growth factor binding protein 2	1.09	0.00223
NECTIN3	nectin cell adhesion molecule 3	1.1	6.89e-05
HPS5	HPS5, biogenesis of lysosomal organelles complex 2 subunit 2	1.11	0.000186
DSTN	destrin, actin depolymerizing factor	1.11	0.0037
NPR3	natriuretic peptide receptor 3	1.12	5.37e-06
UGP2	UDP-glucose pyrophosphorylase 2	1.13	9.44e-06
KCTD20	potassium channel tetramerization domain containing 20	1.13	9.46e-06
ARL6IP5	ADP ribosylation factor like GTPase 6 interacting protein 5	1.13	0.023
KRTAP1-5	keratin associated protein 1-5	1.14	0.000279
DUSP1	dual specificity phosphatase 1	1.14	0.00153
KCNK6	potassium two pore domain channel subfamily K member 6	1.15	8.27e-06
GCHFR	GTP cyclohydrolase I feedback regulator	1.15	5.46e-05
OLFML2A	olfactomedin like 2A	1.15	0.00023
CERS6	ceramide synthase 6	1.16	9.91e-06
ITGA10	integrin subunit alpha 10	1.16	0.000726
COX7A1	cytochrome c oxidase subunit 7A1	1.17	0.00207
TCEAL4	transcription elongation factor A like 4	1.18	0.00103
MT1M	metallothionein 1M	1.19	0.000104
RAB11FIP1	RAB11 family interacting protein 1	1.2	1.03e-05
ADRA1B	adrenoceptor alpha 1B	1.21	1.94e-05
TSPAN18	tetraspanin 18	1.21	6.89e-05
SRGN	serglycin	1.21	0.000248
SORBS2	sorbin and SH3 domain containing 2	1.23	9.83e-05
FBLN5	fibulin 5	1.24	8.16e-06
HIST1H1C	histone cluster 1, H1c	1.25	0.00766
MT1A	metallothionein 1A	1.26	2.2e-05
ZBTB16	zinc finger and BTB domain containing 16	1.27	3.81e-06
SVEP1	sushi, von Willebrand factor type A, EGF and pentraxin domain containing 1	1.27	7.34e-05
H2AFJ	H2A histone family member J	1.27	0.000354
CEBPD	CCAAT/enhancer binding protein delta	1.28	9.46e-06
CD24	CD24 molecule	1.29	2.69e-06
NEXN	nexilin F-actin binding protein	1.3	9.94e-06
PTGER2	prostaglandin E receptor 2	1.32	3.46e-06
MT1X	metallothionein 1X	1.32	0.000576
C1orf198	chromosome 1 open reading frame 198	1.33	6.89e-06
ABCA8	ATP binding cassette subfamily A member 8	1.35	0.000186
ANGPT1	angiopoietin 1	1.37	3.23e-06
ADH1A	alcohol dehydrogenase 1A (class I), alpha polypeptide	1.38	6.38e-06
PTN	pleiotrophin	1.39	7.06e-06
DDAH1	dimethylarginine dimethylaminohydrolase 1	1.39	0.00241
SSB	Sjogren syndrome antigen B	1.4	9.91e-06
ENDOD1	endonuclease domain containing 1	1.41	3.21e-05
ITGA5	integrin subunit alpha 5	1.41	4.23e-05
RHOB	ras homolog family member B	1.42	0.0104
EXOG	endo/exonuclease (5'-3'), endonuclease G-like	1.43	0.0036
EPS8	epidermal growth factor receptor pathway substrate 8	1.45	2.36e-06
ANXA2P1	annexin A2 pseudogene 1	1.46	0.00106
CHST7	carbohydrate sulfotransferase 7	1.47	2.36e-06
ANKRD1	ankyrin repeat domain 1	1.47	0.000326
MT1G	metallothionein 1G	1.47	0.000899
TRNP1	TMF1-regulated nuclear protein 1	1.5	1.57e-05
TMTC1	transmembrane and tetratricopeptide repeat containing 1	1.51	0.000128
HSPB1	heat shock protein family B (small) member 1	1.51	0.000296
APOD	apolipoprotein D	1.52	2.3e-06
MT1E	metallothionein 1E	1.54	6.69e-05
NR2F1	nuclear receptor subfamily 2 group F member 1	1.55	2.3e-06
DDIT4	DNA damage inducible transcript 4	1.56	1.19e-05
PPARG	peroxisome proliferator activated receptor gamma	1.62	3.39e-06
ADM	adrenomedullin	1.62	9.3e-06
CAMK2N1	calcium/calmodulin dependent protein kinase II inhibitor 1	1.65	3.85e-06
DCN	decorin	1.67	1.28e-05
LMCD1	LIM and cysteine rich domains 1	1.74	1.26e-05
C10orf54	chromosome 10 open reading frame 54	1.76	1.01e-06
ANGPTL4	angiopoietin like 4	1.78	0.000619
GAS1	growth arrest specific 1	1.8	5.57e-05
ADARB1	adenosine deaminase, RNA specific B1	1.83	1.01e-06
LEP	leptin	1.83	3.22e-05
IRS2	insulin receptor substrate 2	1.87	9.46e-06
FRZB	frizzled-related protein	1.88	2.24e-06
IMPA2	inositol monophosphatase 2	1.96	3.02e-05
TSC22D3	TSC22 domain family member 3	2.08	3.87e-07
SORT1	sortilin 1	2.12	1.69e-07
COL8A1	collagen type VIII alpha 1 chain	2.14	9.92e-07
CRYAB	crystallin alpha B	2.29	2.46e-06
BMP6	bone morphogenetic protein 6	2.31	9.72e-07
FBN2	fibrillin 2	2.33	6.49e-06
EFHD1	EF-hand domain family member D1	2.34	2.19e-06
DUSP23	dual specificity phosphatase 23	2.42	1.27e-05
COL11A1	collagen type XI alpha 1 chain	2.46	7.14e-08
LEPR	leptin receptor	2.56	1.01e-06
CIDEC	cell death inducing DFFA like effector c	2.69	1.52e-08
AOX1	aldehyde oxidase 1	2.7	1.31e-06
MAOA	monoamine oxidase A	2.88	3.03e-07
FKBP5	FK506 binding protein 5	2.94	6.42e-06
RGCC	regulator of cell cycle	3.32	6.39e-07
PPP1R14A	protein phosphatase 1 regulatory inhibitor subunit 14A	3.33	2.15e-08

## Sheet: 8VS0-adj.P.valu<0.05-|logFC|>1
The list of DEGS in COs cultured for 8 days with calcified medium
Gene.symbol	Gene name	logFC	adj.P.Val
PHGDH	phosphoglycerate dehydrogenase	-3.29	2.24e-09
CXCL12	C-X-C motif chemokine ligand 12	-3.26	7.31e-08
PSAT1	phosphoserine aminotransferase 1	-3.07	6.02e-09
KRT19	keratin 19	-2.98	1.14e-08
IER3	immediate early response 3	-2.82	2.48e-09
IL6	interleukin 6	-2.8	4.84e-09
GREM1	gremlin 1, DAN family BMP antagonist	-2.73	2.39e-07
ID2	inhibitor of DNA binding 2, HLH protein	-2.54	1.88e-08
ASNS	asparagine synthetase (glutamine-hydrolyzing)	-2.51	1.19e-07
KRT34	keratin 34	-2.47	7.41e-08
SLC7A5	solute carrier family 7 member 5	-2.46	3.86e-07
NRG1	neuregulin 1	-2.45	1.45e-08
C11orf87	chromosome 11 open reading frame 87	-2.42	8.58e-09
NREP	neuronal regeneration related protein	-2.39	1.1e-08
FNDC1	fibronectin type III domain containing 1	-2.36	4.96e-08
NGF	nerve growth factor	-2.35	1.3e-08
TUBB3	tubulin beta 3 class III	-2.33	6.97e-09
MALL	mal, T-cell differentiation protein like	-2.31	3.93e-08
ALPK2	alpha kinase 2	-2.3	1.46e-07
FLG	filaggrin	-2.29	1.72e-07
HAS2	hyaluronan synthase 2	-2.29	8.18e-07
CLDN11	claudin 11	-2.24	3.83e-07
TGFBI	transforming growth factor beta induced	-2.14	3.61e-08
SHISA2	shisa family member 2	-2.09	8.58e-09
PODXL	podocalyxin like	-2.02	5.61e-09
ADAMTS1	ADAM metallopeptidase with thrombospondin type 1 motif 1	-2	5.53e-07
PLAT	plasminogen activator, tissue type	-1.99	1.63e-07
NTM	neurotrimin	-1.89	2.13e-07
IGFBP3	insulin like growth factor binding protein 3	-1.87	9.87e-07
NTN4	netrin 4	-1.87	1.42e-06
RGS4	regulator of G-protein signaling 4	-1.86	3.03e-07
APCDD1L	APC down-regulated 1 like	-1.85	1.45e-08
SNAR-A1	small ILF3/NF90-associated RNA A1	-1.85	1.61e-05
LDB2	LIM domain binding 2	-1.84	8.15e-08
UHRF1	ubiquitin like with PHD and ring finger domains 1	-1.78	1.77e-07
CD44	CD44 molecule (Indian blood group)	-1.78	1.62e-06
KCNK2	potassium two pore domain channel subfamily K member 2	-1.76	1.91e-08
ODC1	ornithine decarboxylase 1	-1.74	2.93e-08
RGMB	repulsive guidance molecule family member b	-1.7	5.59e-07
GABBR2	gamma-aminobutyric acid type B receptor subunit 2	-1.69	1.81e-08
PHLDA1	pleckstrin homology like domain family A member 1	-1.69	1.77e-07
PFKP	phosphofructokinase, platelet	-1.68	1.08e-07
LPXN	leupaxin	-1.67	2.73e-07
EVA1A	eva-1 homolog A, regulator of programmed cell death	-1.65	2.63e-06
FRMD6	FERM domain containing 6	-1.64	2.44e-08
DPYSL3	dihydropyrimidinase like 3	-1.63	1.64e-06
GPR68	G protein-coupled receptor 68	-1.62	5.2e-08
HBEGF	heparin binding EGF like growth factor	-1.62	4.28e-07
PLAUR	plasminogen activator, urokinase receptor	-1.59	2.39e-07
FOXD1	forkhead box D1	-1.58	1.46e-07
CDC20	cell division cycle 20	-1.57	1.01e-07
TMEM158	transmembrane protein 158 (gene/pseudogene)	-1.56	1.72e-07
FST	follistatin	-1.55	1.16e-07
RCAN1	regulator of calcineurin 1	-1.52	2.35e-06
HIST1H4C	histone cluster 1, H4c	-1.5	1.46e-07
MCM7	minichromosome maintenance complex component 7	-1.49	7.65e-07
PTTG1	pituitary tumor-transforming 1	-1.49	3.49e-06
UBE2C	ubiquitin conjugating enzyme E2 C	-1.47	4.88e-06
SRSF2	serine and arginine rich splicing factor 2	-1.46	5.24e-07
ELN	elastin	-1.46	2.26e-06
TYMS	thymidylate synthetase	-1.46	5.2e-06
MDK	midkine (neurite growth-promoting factor 2)	-1.45	1.13e-07
CIRBP	cold inducible RNA binding protein	-1.45	3.97e-05
VEGFC	vascular endothelial growth factor C	-1.44	1.99e-08
CRABP2	cellular retinoic acid binding protein 2	-1.44	4.46e-07
CPA4	carboxypeptidase A4	-1.43	1.49e-06
TMEM200A	transmembrane protein 200A	-1.41	5.37e-07
SCRG1	stimulator of chondrogenesis 1	-1.4	4.39e-07
WARS	tryptophanyl-tRNA synthetase	-1.39	9.27e-08
MAD2L1	MAD2 mitotic arrest deficient-like 1 (yeast)	-1.38	5.62e-07
TRIP13	thyroid hormone receptor interactor 13	-1.38	6.08e-07
SLC7A1	solute carrier family 7 member 1	-1.37	1.72e-06
DNAJC9	DnaJ heat shock protein family (Hsp40) member C9	-1.36	4.66e-06
CDC45	cell division cycle 45	-1.36	6.06e-06
FEN1	flap structure-specific endonuclease 1	-1.35	2.32e-06
HMGN2	high mobility group nucleosomal binding domain 2	-1.35	0.000258
IGFBP5	insulin like growth factor binding protein 5	-1.34	1.39e-07
PRC1	protein regulator of cytokinesis 1	-1.34	3.21e-07
HAPLN1	hyaluronan and proteoglycan link protein 1	-1.34	2.07e-06
AURKB	aurora kinase B	-1.34	1.17e-05
STAT4	signal transducer and activator of transcription 4	-1.33	2.67e-07
FAM129A	family with sequence similarity 129 member A	-1.33	3.6e-06
MARCKSL1	MARCKS like 1	-1.32	8.1e-07
FGFRL1	fibroblast growth factor receptor-like 1	-1.32	8.96e-06
MCM3	minichromosome maintenance complex component 3	-1.31	6.04e-06
TNC	tenascin C	-1.31	4.69e-05
WNT5A	Wnt family member 5A	-1.3	1.54e-05
EGR1	early growth response 1	-1.29	3.04e-07
FABP5	fatty acid binding protein 5	-1.28	5.66e-07
TUBA1A	tubulin alpha 1a	-1.28	3.15e-05
FLNC	filamin C	-1.28	0.000531
FIGNL1	fidgetin like 1	-1.27	3.68e-05
BDNF	brain derived neurotrophic factor	-1.26	5.61e-07
ENC1	ectodermal-neural cortex 1	-1.25	8.47e-06
ABL1	ABL proto-oncogene 1, non-receptor tyrosine kinase	-1.25	1.46e-05
CCNB2	cyclin B2	-1.25	2.33e-05
BDKRB1	bradykinin receptor B1	-1.24	5.19e-06
CSRNP1	cysteine and serine rich nuclear protein 1	-1.23	3.81e-07
PNP	purine nucleoside phosphorylase	-1.23	1.84e-06
PTTG3P	pituitary tumor-transforming 3, pseudogene	-1.22	1.64e-05
AURKA	aurora kinase A	-1.21	1.57e-06
TUBB4B	tubulin beta 4B class IVb	-1.21	6.15e-05
ASPM	abnormal spindle microtubule assembly	-1.21	0.000116
UGCG	UDP-glucose ceramide glucosyltransferase	-1.2	0.000358
EBNA1BP2	EBNA1 binding protein 2	-1.19	8.52e-06
LOX	lysyl oxidase	-1.19	1.9e-05
DRAP1	DR1 associated protein 1	-1.19	0.000125
CDCA5	cell division cycle associated 5	-1.18	1.33e-06
TOP2A	topoisomerase (DNA) II alpha	-1.18	1.64e-05
TUBA1C	tubulin alpha 1c	-1.17	3.21e-06
JUN	Jun proto-oncogene, AP-1 transcription factor subunit	-1.16	2.71e-05
TM4SF1	transmembrane 4 L six family member 1	-1.16	4e-05
EXT1	exostosin glycosyltransferase 1	-1.15	2.39e-07
DCBLD2	discoidin, CUB and LCCL domain containing 2	-1.15	2.35e-06
PPP1R14B	protein phosphatase 1 regulatory inhibitor subunit 14B	-1.15	4.23e-06
FAM64A	family with sequence similarity 64 member A	-1.15	5.36e-06
H2AFZ	H2A histone family member Z	-1.15	8.4e-06
PRKCA	protein kinase C alpha	-1.15	3.14e-05
NEK7	NIMA related kinase 7	-1.15	0.000146
MCM4	minichromosome maintenance complex component 4	-1.14	2.43e-07
KIAA0101	KIAA0101	-1.14	1.27e-05
SMYD3	SET and MYND domain containing 3	-1.14	2.95e-05
GINS2	GINS complex subunit 2	-1.14	3.01e-05
NCEH1	neutral cholesterol ester hydrolase 1	-1.13	1.83e-06
FBXO5	F-box protein 5	-1.13	2.16e-06
TK1	thymidine kinase 1	-1.13	6.04e-06
IL7R	interleukin 7 receptor	-1.13	1.25e-05
SMS	spermine synthase	-1.12	1.7e-07
C1QBP	complement C1q binding protein	-1.12	2.41e-07
CENPM	centromere protein M	-1.11	1.46e-06
ITIH3	inter-alpha-trypsin inhibitor heavy chain 3	-1.11	2.04e-05
HNRNPA2B1	heterogeneous nuclear ribonucleoprotein A2/B1	-1.11	4.46e-05
TRMT5	tRNA methyltransferase 5	-1.11	0.000143
SPHK1	sphingosine kinase 1	-1.1	4.3e-06
RPS7	ribosomal protein S7	-1.1	1.11e-05
RANBP1	RAN binding protein 1	-1.1	2.74e-05
ALDH1A3	aldehyde dehydrogenase 1 family member A3	-1.1	3.08e-05
RAC2	ras-related C3 botulinum toxin substrate 2 (rho family, small GTP binding protein Rac2)	-1.1	0.000147
FHL2	four and a half LIM domains 2	-1.09	5.53e-07
DDX39A	DEAD-box helicase 39A	-1.09	3.94e-06
FLNB	filamin B	-1.09	9.26e-06
CDCA3	cell division cycle associated 3	-1.09	0.00103
E2F7	E2F transcription factor 7	-1.08	5.31e-06
CENPW	centromere protein W	-1.08	7.79e-06
ADGRG1	adhesion G protein-coupled receptor G1	-1.08	2.37e-05
SOX11	SRY-box 11	-1.07	9.41e-07
FOXQ1	forkhead box Q1	-1.07	3.48e-06
TOMM40	translocase of outer mitochondrial membrane 40	-1.07	1.28e-05
STAT1	signal transducer and activator of transcription 1	-1.07	1.53e-05
FTSJ1	FtsJ RNA methyltransferase homolog 1 (E. coli)	-1.07	2.48e-05
SAC3D1	SAC3 domain containing 1	-1.06	5.36e-06
IMPDH2	inosine monophosphate dehydrogenase 2	-1.06	8.96e-06
CCNA2	cyclin A2	-1.06	2.24e-05
SYNCRIP	synaptotagmin binding cytoplasmic RNA interacting protein	-1.06	0.000258
CARD10	caspase recruitment domain family member 10	-1.05	9.96e-07
SLC1A5	solute carrier family 1 member 5	-1.05	7.12e-05
NUSAP1	nucleolar and spindle associated protein 1	-1.05	0.000214
CALB2	calbindin 2	-1.04	6.06e-06
NMB	neuromedin B	-1.04	1.19e-05
SEL1L3	SEL1L family member 3	-1.04	2.49e-05
GPER1	G protein-coupled estrogen receptor 1	-1.03	5.24e-07
HJURP	Holliday junction recognition protein	-1.03	6.44e-07
ENPP2	ectonucleotide pyrophosphatase/phosphodiesterase 2	-1.03	1.04e-05
RPL29	ribosomal protein L29	-1.03	3.99e-05
SERPINE1	serpin family E member 1	-1.03	5.54e-05
RPS24	ribosomal protein S24	-1.03	9.53e-05
CKS1B	CDC28 protein kinase regulatory subunit 1B	-1.03	0.000268
C7orf50	chromosome 7 open reading frame 50	-1.02	2.2e-05
TUBA3D	tubulin alpha 3d	-1.02	0.016
GLIPR1	GLI pathogenesis related 1	-1.01	1.45e-05
GJA1	gap junction protein alpha 1	-1.01	0.00139
ITGA5	integrin subunit alpha 5	1.01	2.5e-06
S100A13	S100 calcium binding protein A13	1.01	4.5e-06
GGT5	gamma-glutamyltransferase 5	1.01	5.58e-06
OLFML2B	olfactomedin like 2B	1.01	1.19e-05
ZMAT3	zinc finger matrin-type 3	1.01	1.23e-05
TFPI	tissue factor pathway inhibitor	1.02	1.46e-06
CPQ	carboxypeptidase Q	1.02	5.04e-06
USP53	ubiquitin specific peptidase 53	1.02	7.18e-06
CCDC68	coiled-coil domain containing 68	1.02	2.9e-05
ACSL1	acyl-CoA synthetase long-chain family member 1	1.02	0.0005
ARHGEF6	Rac/Cdc42 guanine nucleotide exchange factor 6	1.03	3.81e-07
ALDH6A1	aldehyde dehydrogenase 6 family member A1	1.03	8.95e-07
RCBTB2	RCC1 and BTB domain containing protein 2	1.03	1.49e-06
C5AR1	complement component 5a receptor 1	1.03	3.8e-06
QPRT	quinolinate phosphoribosyltransferase	1.03	5.95e-06
VGLL3	vestigial like family member 3	1.03	1.51e-05
METTL7A	methyltransferase like 7A	1.04	1.03e-05
DHCR24	24-dehydrocholesterol reductase	1.04	1.64e-05
GBP2	guanylate binding protein 2	1.05	2.28e-06
MAP1LC3A	microtubule associated protein 1 light chain 3 alpha	1.05	2.55e-06
ANKRD35	ankyrin repeat domain 35	1.05	5.05e-06
CLIP3	CAP-Gly domain containing linker protein 3	1.05	8.51e-06
STK38	serine/threonine kinase 38	1.05	1.56e-05
EFNB2	ephrin B2	1.05	5.36e-05
RENBP	renin binding protein	1.06	4.49e-07
TYMP	thymidine phosphorylase	1.06	6.45e-06
NFKBIA	NFKB inhibitor alpha	1.06	8.6e-06
NNMT	nicotinamide N-methyltransferase	1.06	1.19e-05
FCGRT	Fc fragment of IgG receptor and transporter	1.06	1.73e-05
AFAP1L1	actin filament associated protein 1 like 1	1.07	8.95e-07
APOB	apolipoprotein B	1.07	1.73e-06
GPD1L	glycerol-3-phosphate dehydrogenase 1-like	1.07	4.16e-06
HIST1H2AC	histone cluster 1, H2ac	1.07	5.36e-06
TMBIM1	transmembrane BAX inhibitor motif containing 1	1.07	2.47e-05
AHNAK2	AHNAK nucleoprotein 2	1.07	0.000144
PDE1A	phosphodiesterase 1A	1.08	3.77e-07
IFNGR1	interferon gamma receptor 1	1.08	1.54e-06
RAB11FIP1	RAB11 family interacting protein 1	1.08	2.35e-06
TNFRSF14	TNF receptor superfamily member 14	1.08	3.94e-06
RGS2	regulator of G-protein signaling 2	1.08	5.58e-06
WDR19	WD repeat domain 19	1.08	3.5e-05
SLC25A23	solute carrier family 25 member 23	1.09	5.14e-07
TGFBR3	transforming growth factor beta receptor 3	1.09	3.94e-06
PDCD4	programmed cell death 4 (neoplastic transformation inhibitor)	1.09	5.58e-06
PPP1R3C	protein phosphatase 1 regulatory subunit 3C	1.09	7.29e-06
PIP	prolactin induced protein	1.09	1.02e-05
TBCK	TBC1 domain containing kinase	1.09	1.29e-05
ARRDC2	arrestin domain containing 2	1.09	0.000346
RAB31	RAB31, member RAS oncogene family	1.1	3.52e-06
ZFP36	ZFP36 ring finger protein	1.1	2.85e-05
RRAS	related RAS viral (r-ras) oncogene homolog	1.1	4.47e-05
ZCCHC24	zinc finger CCHC-type containing 24	1.1	0.000141
MAP2K2	mitogen-activated protein kinase kinase 2	1.1	0.000282
PTGER4	prostaglandin E receptor 4	1.11	7.85e-07
PDGFD	platelet derived growth factor D	1.11	1.13e-06
LAMP2	lysosomal associated membrane protein 2	1.11	1.45e-06
STAT5A	signal transducer and activator of transcription 5A	1.11	8.47e-06
PLXNB1	plexin B1	1.11	1.73e-05
TMEM119	transmembrane protein 119	1.11	4.51e-05
SREBF1	sterol regulatory element binding transcription factor 1	1.11	4.57e-05
MOXD1	monooxygenase DBH like 1	1.11	6.42e-05
NEDD9	neural precursor cell expressed, developmentally down-regulated 9	1.12	4.45e-07
SOD2	superoxide dismutase 2, mitochondrial	1.12	6.77e-06
PC	pyruvate carboxylase	1.12	2.72e-05
LSS	lanosterol synthase (2,3-oxidosqualene-lanosterol cyclase)	1.12	3.57e-05
SLC26A6	solute carrier family 26 member 6	1.12	5.02e-05
LEPROT	leptin receptor overlapping transcript	1.12	0.000362
MXD4	MAX dimerization protein 4	1.13	1.64e-06
GADD45B	growth arrest and DNA damage inducible beta	1.13	2.16e-06
SDCBP	syndecan binding protein	1.13	2.62e-06
LHFP	lipoma HMGIC fusion partner	1.13	3.94e-06
TMEM140	transmembrane protein 140	1.13	7.81e-06
PTGDS	prostaglandin D2 synthase	1.13	1.4e-05
SORBS2	sorbin and SH3 domain containing 2	1.15	2.1e-05
COL8A2	collagen type VIII alpha 2 chain	1.15	3.3e-05
LPIN1	lipin 1	1.15	6.72e-05
RGMA	repulsive guidance molecule family member a	1.16	2.35e-06
GLS	glutaminase	1.16	1.65e-05
TPP1	tripeptidyl peptidase 1	1.16	2.56e-05
DSE	dermatan sulfate epimerase	1.16	2.71e-05
ANGPTL4	angiopoietin like 4	1.16	4.24e-05
GLMP	glycosylated lysosomal membrane protein	1.17	2.09e-06
ITGA1	integrin subunit alpha 1	1.17	1.45e-05
H2AFJ	H2A histone family member J	1.17	0.000134
LTBR	lymphotoxin beta receptor	1.17	0.000709
EIF4A2	eukaryotic translation initiation factor 4A2	1.18	9.92e-08
CFLAR	CASP8 and FADD like apoptosis regulator	1.18	1.68e-06
SUGCT	succinyl-CoA:glutarate-CoA transferase	1.18	4.65e-06
SH3BGRL	SH3 domain binding glutamate rich protein like	1.18	5.17e-06
HIST1H2BK	histone cluster 1, H2bk	1.18	2.35e-05
RAP1GAP	RAP1 GTPase activating protein	1.19	1.6e-07
EPS8	epidermal growth factor receptor pathway substrate 8	1.19	5.46e-05
NUPR1	nuclear protein 1, transcriptional regulator	1.2	2.07e-05
ISM1	isthmin 1, angiogenesis inhibitor	1.2	0.000359
SLC44A2	solute carrier family 44 member 2	1.21	2.43e-06
SNORD13	small nucleolar RNA, C/D box 13	1.22	1.29e-06
GABARAPL1	GABA type A receptor associated protein like 1	1.22	1.3e-06
PLAC9	placenta specific 9	1.22	0.000121
ANG	angiogenin	1.23	3.4e-07
OSBPL10	oxysterol binding protein like 10	1.23	2.38e-06
OPTN	optineurin	1.23	6.22e-06
PTPRM	protein tyrosine phosphatase, receptor type M	1.24	3.75e-06
NINJ2	ninjurin 2	1.24	1.38e-05
STON1	stonin 1	1.25	2.03e-07
MIOS	meiosis regulator for oocyte development	1.25	4.03e-06
ADRA1B	adrenoceptor alpha 1B	1.25	2.71e-05
TXNIP	thioredoxin interacting protein	1.25	0.000205
ARL6IP5	ADP ribosylation factor like GTPase 6 interacting protein 5	1.25	0.00178
C1orf198	chromosome 1 open reading frame 198	1.26	4.61e-07
PDGFRB	platelet derived growth factor receptor beta	1.26	5.47e-07
MT1E	metallothionein 1E	1.26	2.3e-06
TNFAIP8L3	TNF alpha induced protein 8 like 3	1.27	5.82e-07
OPN3	opsin 3	1.28	1.16e-07
GK5	glycerol kinase 5 (putative)	1.28	4.13e-07
MYO1D	myosin ID	1.28	2.6e-06
CTHRC1	collagen triple helix repeat containing 1	1.28	2.8e-06
SERPINF1	serpin family F member 1	1.28	8.96e-06
HSD11B1	hydroxysteroid 11-beta dehydrogenase 1	1.29	3.81e-07
FOXO3	forkhead box O3	1.29	2.23e-06
COL12A1	collagen type XII alpha 1 chain	1.3	4.29e-07
PIK3R1	phosphoinositide-3-kinase regulatory subunit 1	1.3	2.47e-05
CCL13	C-C motif chemokine ligand 13	1.31	2.97e-07
RFTN2	raftlin family member 2	1.32	2.45e-07
FADS1	fatty acid desaturase 1	1.32	3.82e-06
DHCR7	7-dehydrocholesterol reductase	1.33	7.5e-08
PRKD1	protein kinase D1	1.33	1.39e-07
F2R	coagulation factor II thrombin receptor	1.33	2.32e-06
PLA2G16	phospholipase A2 group XVI	1.33	2.32e-06
COX7A1	cytochrome c oxidase subunit 7A1	1.33	6.46e-05
OLFML3	olfactomedin like 3	1.35	1.57e-06
PON2	paraoxonase 2	1.36	5.04e-08
HPS5	HPS5, biogenesis of lysosomal organelles complex 2 subunit 2	1.36	1.8e-07
PDXK	pyridoxal (pyridoxine, vitamin B6) kinase	1.36	2.13e-07
TCEAL3	transcription elongation factor A like 3	1.36	1.12e-06
DKK1	dickkopf WNT signaling pathway inhibitor 1	1.36	5.46e-06
FOXN3	forkhead box N3	1.37	1.54e-06
NEXN	nexilin F-actin binding protein	1.38	1.91e-06
RNASE4	ribonuclease A family member 4	1.39	1.97e-06
GPM6B	glycoprotein M6B	1.41	4.39e-07
GSN	gelsolin	1.42	8.65e-06
PODN	podocan	1.43	2.58e-07
GNPDA1	glucosamine-6-phosphate deaminase 1	1.43	1.63e-05
FAM46B	family with sequence similarity 46 member B	1.44	3.51e-07
SAA1	serum amyloid A1	1.44	4.72e-06
ABCA6	ATP binding cassette subfamily A member 6	1.45	3.94e-06
PTGER2	prostaglandin E receptor 2	1.46	1.45e-07
SLC40A1	solute carrier family 40 member 1	1.46	1.46e-07
MT1M	metallothionein 1M	1.46	1.49e-06
C1QTNF5	C1q and tumor necrosis factor related protein 5	1.46	2.37e-05
MFGE8	milk fat globule-EGF factor 8 protein	1.47	3.01e-07
RHOBTB3	Rho related BTB domain containing 3	1.47	1.95e-05
CHST7	carbohydrate sulfotransferase 7	1.48	1.16e-07
SLC44A1	solute carrier family 44 member 1	1.48	1.8e-07
ACSS2	acyl-CoA synthetase short-chain family member 2	1.49	3.12e-07
CTSK	cathepsin K	1.49	1.67e-06
SLC35F5	solute carrier family 35 member F5	1.49	7.32e-06
SMPDL3A	sphingomyelin phosphodiesterase acid like 3A	1.5	8.02e-08
MFAP4	microfibrillar associated protein 4	1.5	9.68e-08
ST6GAL1	ST6 beta-galactoside alpha-2,6-sialyltransferase 1	1.51	8.66e-08
SUSD2	sushi domain containing 2	1.51	1.22e-07
SRPX	sushi repeat containing protein, X-linked	1.51	1.84e-07
WASF3	WAS protein family member 3	1.51	4.27e-07
RPS29	ribosomal protein S29	1.51	1.09e-06
ZNF106	zinc finger protein 106	1.53	1.46e-07
STAT2	signal transducer and activator of transcription 2	1.53	7.62e-07
FASN	fatty acid synthase	1.53	7.18e-06
DCLK1	doublecortin like kinase 1	1.54	2.44e-08
IFITM1	interferon induced transmembrane protein 1	1.54	1.94e-06
TNS3	tensin 3	1.55	8.95e-07
ECM2	extracellular matrix protein 2	1.56	9.92e-08
TEX2	testis expressed 2	1.56	9.14e-06
CERS6	ceramide synthase 6	1.57	1.57e-07
ADCY3	adenylate cyclase 3	1.58	9.92e-08
ALPL	alkaline phosphatase, liver/bone/kidney	1.58	1.7e-07
PDGFRL	platelet derived growth factor receptor like	1.58	3.26e-07
FBLN2	fibulin 2	1.58	1.42e-06
SH3D19	SH3 domain containing 19	1.61	7.5e-08
CEBPD	CCAAT/enhancer binding protein delta	1.63	1.24e-07
TSPAN18	tetraspanin 18	1.63	2.53e-07
BCL6	B-cell CLL/lymphoma 6	1.63	1.25e-06
IMPA2	inositol monophosphatase 2	1.63	5e-05
RPS6KA2	ribosomal protein S6 kinase A2	1.64	7.56e-07
PTN	pleiotrophin	1.65	9.43e-07
HSPB1	heat shock protein family B (small) member 1	1.69	9.7e-06
ADH1B	alcohol dehydrogenase 1B (class I), beta polypeptide	1.69	2.83e-05
GPNMB	glycoprotein nmb	1.7	6.34e-08
SPRY1	sprouty RTK signaling antagonist 1	1.7	8.55e-08
SAT1	spermidine/spermine N1-acetyltransferase 1	1.7	9.35e-07
FZD4	frizzled class receptor 4	1.71	2.18e-08
RASD1	ras related dexamethasone induced 1	1.74	1.8e-07
TMEM204	transmembrane protein 204	1.75	8.66e-08
ABCC3	ATP binding cassette subfamily C member 3	1.75	5.47e-07
ENDOD1	endonuclease domain containing 1	1.76	3.48e-07
GPC4	glypican 4	1.77	7.29e-08
TCEAL4	transcription elongation factor A like 4	1.77	4.45e-07
RAP2A	RAP2A, member of RAS oncogene family	1.79	1.07e-05
TIMP4	TIMP metallopeptidase inhibitor 4	1.8	1.26e-07
PLSCR4	phospholipid scramblase 4	1.81	1.41e-06
PCDH18	protocadherin 18	1.82	9.68e-08
ABCA8	ATP binding cassette subfamily A member 8	1.83	9.87e-07
KCNT2	potassium sodium-activated channel subfamily T member 2	1.85	1.82e-07
CMTM8	CKLF like MARVEL transmembrane domain containing 8	1.85	5.39e-07
MMP7	matrix metallopeptidase 7	1.87	3.7e-09
RECK	reversion inducing cysteine rich protein with kazal motifs	1.89	3.4e-07
LMCD1	LIM and cysteine rich domains 1	1.9	3.56e-07
NR2F1	nuclear receptor subfamily 2 group F member 1	1.91	1.26e-08
MAN1C1	mannosidase alpha class 1C member 1	1.96	1.45e-07
IGF2	insulin like growth factor 2	1.99	1.14e-08
SORT1	sortilin 1	2	6.2e-09
OSBPL5	oxysterol binding protein like 5	2.02	4.84e-09
ITGA10	integrin subunit alpha 10	2.03	2.4e-08
GCHFR	GTP cyclohydrolase I feedback regulator	2.07	5.47e-06
GAS6	growth arrest specific 6	2.09	7.62e-07
FMO3	flavin containing monooxygenase 3	2.11	2.48e-09
DDIT4	DNA damage inducible transcript 4	2.11	3.6e-07
MTSS1	metastasis suppressor 1	2.12	1.57e-08
CAMK2N1	calcium/calmodulin dependent protein kinase II inhibitor 1	2.12	9.68e-08
CYBRD1	cytochrome b reductase 1	2.15	2.62e-09
IRS2	insulin receptor substrate 2	2.17	8.46e-08
HOPX	HOP homeobox	2.19	2.48e-09
ZBTB16	zinc finger and BTB domain containing 16	2.21	4.99e-09
CRYAB	crystallin alpha B	2.24	1.67e-08
TRNP1	TMF1-regulated nuclear protein 1	2.25	1.46e-07
FOXO1	forkhead box O1	2.26	1.11e-07
GPX3	glutathione peroxidase 3	2.28	4.12e-09
SLC46A3	solute carrier family 46 member 3	2.28	4.12e-09
IGFBP2	insulin like growth factor binding protein 2	2.29	2.14e-08
FBXO32	F-box protein 32	2.3	1.45e-07
TMTC1	transmembrane and tetratricopeptide repeat containing 1	2.33	8.38e-08
SCD	stearoyl-CoA desaturase	2.33	1.52e-07
GAS1	growth arrest specific 1	2.34	4.35e-07
PROS1	protein S (alpha)	2.37	1.45e-08
COL7A1	collagen type VII alpha 1 chain	2.38	8.46e-08
PPARG	peroxisome proliferator activated receptor gamma	2.4	1.82e-09
ADM	adrenomedullin	2.4	3.39e-08
C10orf10	chromosome 10 open reading frame 10	2.44	9.35e-09
CD14	CD14 molecule	2.45	1.8e-08
COMP	cartilage oligomeric matrix protein	2.52	6.78e-08
FBLN1	fibulin 1	2.53	4.12e-09
DCN	decorin	2.54	6.03e-09
CFH	complement factor H	2.58	4.12e-09
DUSP23	dual specificity phosphatase 23	2.63	2.48e-09
OMD	osteomodulin	2.64	8.58e-09
CD24	CD24 molecule	2.66	4.12e-09
FBLN5	fibulin 5	2.71	3.7e-09
ANGPT1	angiopoietin 1	2.71	3.61e-08
CORIN	corin, serine peptidase	2.73	4.84e-09
ADARB1	adenosine deaminase, RNA specific B1	2.76	3.7e-09
AOX1	aldehyde oxidase 1	2.77	5.61e-09
COL8A1	collagen type VIII alpha 1 chain	2.81	6.2e-09
LEPR	leptin receptor	2.83	2.48e-09
EFHD1	EF-hand domain family member D1	2.88	1.28e-08
SVEP1	sushi, von Willebrand factor type A, EGF and pentraxin domain containing 1	2.91	4.79e-09
MT1X	metallothionein 1X	2.97	2.4e-08
PPP1R14A	protein phosphatase 1 regulatory inhibitor subunit 14A	3.07	2.62e-09
CFD	complement factor D	3.15	6.79e-09
MGP	matrix Gla protein	3.28	1.92e-10
TSC22D3	TSC22 domain family member 3	3.36	2.48e-09
FBN2	fibrillin 2	3.37	2.24e-09
MME	membrane metallo-endopeptidase	3.37	1.28e-08
RGCC	regulator of cell cycle	3.48	4.12e-09
OLFML2A	olfactomedin like 2A	3.6	4.12e-09
MAOA	monoamine oxidase A	3.76	1.48e-09
LEP	leptin	3.88	6.2e-09
FKBP5	FK506 binding protein 5	3.98	1.92e-10
FRZB	frizzled-related protein	4.1	9.27e-11
ADH1A	alcohol dehydrogenase 1A (class I), alpha polypeptide	4.16	8.49e-11
CIDEC	cell death inducing DFFA like effector c	4.2	4.92e-09
COL11A1	collagen type XI alpha 1 chain	4.7	8.27e-10
APOD	apolipoprotein D	6	9.78e-12

## Sheet: 12VS0-adj.P.valu<0.05-|logFC|>1
The list of DEGS in COs cultured for 12 days with calcified medium
Gene.symbol	Gene name	logFC	adj.P.Val
CXCL12	C-X-C motif chemokine ligand 12	-3.55166	1.36e-07
KRT19	keratin 19	-3.2187	1.28e-07
PHGDH	phosphoglycerate dehydrogenase	-3.17056	5.33e-07
GREM1	gremlin 1, DAN family BMP antagonist	-3.02608	1.11e-06
IL6	interleukin 6	-2.88989	3.24e-08
PSAT1	phosphoserine aminotransferase 1	-2.82324	2.55e-08
IER3	immediate early response 3	-2.79127	3.24e-08
NRG1	neuregulin 1	-2.58534	9.08e-08
C11orf87	chromosome 11 open reading frame 87	-2.57127	1.42e-07
NREP	neuronal regeneration related protein	-2.47652	4.76e-07
MALL	mal, T-cell differentiation protein like	-2.43661	1.32e-07
TGFBI	transforming growth factor beta induced	-2.43594	5.88e-07
TUBB3	tubulin beta 3 class III	-2.38811	1.15e-07
FLG	filaggrin	-2.37974	1.22e-06
ASNS	asparagine synthetase (glutamine-hydrolyzing)	-2.36763	2.74e-06
NGF	nerve growth factor	-2.35823	9.32e-08
CDC20	cell division cycle 20	-2.34566	1.39e-08
KRT34	keratin 34	-2.32657	7.47e-07
SLC7A5	solute carrier family 7 member 5	-2.30962	4.13e-06
UHRF1	ubiquitin like with PHD and ring finger domains 1	-2.3007	1.59e-06
APCDD1L	APC down-regulated 1 like	-2.28574	4.81e-06
HAS2	hyaluronan synthase 2	-2.28358	4.9e-06
FNDC1	fibronectin type III domain containing 1	-2.22649	1.32e-07
PHLDA1	pleckstrin homology like domain family A member 1	-2.19023	4.53e-07
PTTG1	pituitary tumor-transforming 1	-2.16676	7.92e-07
SHISA2	shisa family member 2	-2.08352	9.32e-08
PODXL	podocalyxin like	-2.07957	6.36e-08
NTN4	netrin 4	-2.07467	1.89e-07
PFKP	phosphofructokinase, platelet	-2.06726	9.06e-07
ALPK2	alpha kinase 2	-2.06177	6.01e-06
CD44	CD44 molecule (Indian blood group)	-2.04152	2.32e-06
GABBR2	gamma-aminobutyric acid type B receptor subunit 2	-2.01694	3.3e-07
KIAA0101	KIAA0101	-2.00635	1.23e-06
PLAT	plasminogen activator, tissue type	-1.97512	1.82e-06
RGS4	regulator of G-protein signaling 4	-1.95569	6.21e-06
PRC1	protein regulator of cytokinesis 1	-1.95466	1.22e-06
NTM	neurotrimin	-1.90985	1.22e-06
UBE2C	ubiquitin conjugating enzyme E2 C	-1.9048	6.26e-07
CLDN11	claudin 11	-1.89536	1.6e-06
TYMS	thymidylate synthetase	-1.85209	2.2e-06
CCNB2	cyclin B2	-1.83565	1.07e-05
TOP2A	topoisomerase (DNA) II alpha	-1.8326	2.74e-06
TRIP13	thyroid hormone receptor interactor 13	-1.82178	1.06e-07
ID2	inhibitor of DNA binding 2, HLH protein	-1.81236	3.14e-06
EVA1A	eva-1 homolog A, regulator of programmed cell death	-1.80693	7.68e-07
ODC1	ornithine decarboxylase 1	-1.79214	9.43e-06
DPYSL3	dihydropyrimidinase like 3	-1.79186	4.09e-06
RGMB	repulsive guidance molecule family member b	-1.7861	1.89e-07
AURKA	aurora kinase A	-1.77575	1.22e-06
KCNK2	potassium two pore domain channel subfamily K member 2	-1.76403	1.23e-07
FEN1	flap structure-specific endonuclease 1	-1.73647	1.36e-05
KIF20A	kinesin family member 20A	-1.72625	1.39e-06
LPXN	leupaxin	-1.71621	1.69e-06
TUBB4B	tubulin beta 4B class IVb	-1.71221	0.000223
WNT5A	Wnt family member 5A	-1.68802	6.31e-07
TMEM158	transmembrane protein 158 (gene/pseudogene)	-1.67818	1.01e-05
LDB2	LIM domain binding 2	-1.66958	5.41e-06
PPP1R14B	protein phosphatase 1 regulatory inhibitor subunit 14B	-1.66455	2.3e-05
HIST1H4C	histone cluster 1, H4c	-1.6601	1.61e-06
AURKB	aurora kinase B	-1.65449	1.75e-06
MAD2L1	MAD2 mitotic arrest deficient-like 1 (yeast)	-1.64175	4.57e-07
PTTG3P	pituitary tumor-transforming 3, pseudogene	-1.63734	2.43e-05
ADAMTS1	ADAM metallopeptidase with thrombospondin type 1 motif 1	-1.63673	0.000607
GINS2	GINS complex subunit 2	-1.62369	3.3e-07
FOXD1	forkhead box D1	-1.60853	4.69e-06
MCM7	minichromosome maintenance complex component 7	-1.60802	6.3e-06
HBEGF	heparin binding EGF like growth factor	-1.5876	2.09e-06
TK1	thymidine kinase 1	-1.58374	1.07e-05
BIRC5	baculoviral IAP repeat containing 5	-1.57215	2.95e-05
H2AFZ	H2A histone family member Z	-1.57015	2.28e-06
GPR68	G protein-coupled receptor 68	-1.56768	5.47e-07
PLAUR	plasminogen activator, urokinase receptor	-1.55317	1.91e-06
FAM64A	family with sequence similarity 64 member A	-1.54971	1.33e-05
CDC45	cell division cycle 45	-1.54297	1.75e-06
RAC2	ras-related C3 botulinum toxin substrate 2 (rho family, small GTP binding protein Rac2)	-1.54123	2.66e-05
NUSAP1	nucleolar and spindle associated protein 1	-1.53689	8.52e-05
DNAJC9	DnaJ heat shock protein family (Hsp40) member C9	-1.53308	3.01e-05
ELN	elastin	-1.53148	1.21e-05
CRABP2	cellular retinoic acid binding protein 2	-1.50767	1.91e-06
CENPF	centromere protein F	-1.49576	1.89e-05
CDCA5	cell division cycle associated 5	-1.49555	2.28e-06
FRMD6	FERM domain containing 6	-1.48855	6.01e-06
FLNC	filamin C	-1.47375	0.00171
HMGA1	high mobility group AT-hook 1	-1.47268	6.65e-06
CENPM	centromere protein M	-1.46715	4.85e-06
SLC7A1	solute carrier family 7 member 1	-1.46534	6.01e-06
WARS	tryptophanyl-tRNA synthetase	-1.45751	1.28e-07
EXT1	exostosin glycosyltransferase 1	-1.45704	0.000133
CCNA2	cyclin A2	-1.45589	1.01e-05
HAPLN1	hyaluronan and proteoglycan link protein 1	-1.45388	4.75e-05
RCAN1	regulator of calcineurin 1	-1.41213	1.31e-05
SPHK1	sphingosine kinase 1	-1.40232	1.31e-05
PNP	purine nucleoside phosphorylase	-1.40073	1.82e-06
ASPM	abnormal spindle microtubule assembly	-1.39444	1.23e-05
NCEH1	neutral cholesterol ester hydrolase 1	-1.39425	8.65e-06
FLNB	filamin B	-1.38891	0.000704
DDX39A	DEAD-box helicase 39A	-1.38801	7.23e-06
SNAR-A1	small ILF3/NF90-associated RNA A1	-1.37941	0.000878
FHL2	four and a half LIM domains 2	-1.36545	2.19e-05
VEGFC	vascular endothelial growth factor C	-1.36177	1.36e-07
STMN1	stathmin 1	-1.34858	1.89e-05
CCDC34	coiled-coil domain containing 34	-1.34588	3.26e-05
CKAP2L	cytoskeleton associated protein 2 like	-1.3347	3.25e-05
MCM3	minichromosome maintenance complex component 3	-1.32934	7.86e-05
GLIPR1	GLI pathogenesis related 1	-1.32717	4.94e-06
LONP1	lon peptidase 1, mitochondrial	-1.32411	3.91e-05
CPA4	carboxypeptidase A4	-1.32099	3.25e-05
TUBB	tubulin beta class I	-1.31927	5.76e-06
SMS	spermine synthase	-1.31825	1.08e-05
CSRNP1	cysteine and serine rich nuclear protein 1	-1.31526	2.86e-05
SAC3D1	SAC3 domain containing 1	-1.31202	5.12e-06
TMEM200A	transmembrane protein 200A	-1.3104	3.14e-06
MDK	midkine (neurite growth-promoting factor 2)	-1.30912	3.35e-06
ABL1	ABL proto-oncogene 1, non-receptor tyrosine kinase	-1.30521	0.000438
ADIRF	adipogenesis regulatory factor	-1.29799	8.25e-05
SRSF2	serine and arginine rich splicing factor 2	-1.28108	3.35e-05
HPCAL1	hippocalcin like 1	-1.27623	1.24e-06
TUBA1C	tubulin alpha 1c	-1.27408	1.11e-06
PRELID1	PRELI domain containing 1	-1.26399	0.000296
UGCG	UDP-glucose ceramide glucosyltransferase	-1.26277	1.22e-06
GPER1	G protein-coupled estrogen receptor 1	-1.25685	1.11e-06
C7orf50	chromosome 7 open reading frame 50	-1.25275	2.11e-05
SCRG1	stimulator of chondrogenesis 1	-1.252	4.39e-06
HNRNPA2B1	heterogeneous nuclear ribonucleoprotein A2/B1	-1.24968	0.000128
KIF11	kinesin family member 11	-1.24936	1.68e-05
SEL1L3	SEL1L family member 3	-1.24817	1.08e-06
BDKRB1	bradykinin receptor B1	-1.24649	9.67e-06
SOX11	SRY-box 11	-1.23872	2.74e-06
C1QBP	complement C1q binding protein	-1.23801	1.64e-06
E2F7	E2F transcription factor 7	-1.23625	1.63e-05
CEP55	centrosomal protein 55	-1.23106	0.00308
MANF	mesencephalic astrocyte derived neurotrophic factor	-1.22725	3.03e-05
LOX	lysyl oxidase	-1.22608	0.000202
IGFBP3	insulin like growth factor binding protein 3	-1.22526	0.00329
FAM129A	family with sequence similarity 129 member A	-1.2252	1.45e-05
STAT4	signal transducer and activator of transcription 4	-1.22053	4.9e-06
KIF2C	kinesin family member 2C	-1.21508	2.32e-05
CDCA3	cell division cycle associated 3	-1.20864	0.000114
TRMT5	tRNA methyltransferase 5	-1.20536	0.000424
POC1A	POC1 centriolar protein A	-1.20034	4.43e-05
MOK	MOK protein kinase	-1.19587	0.000289
CARD10	caspase recruitment domain family member 10	-1.19536	1.23e-06
FAM83D	family with sequence similarity 83 member D	-1.19381	2e-05
MCM4	minichromosome maintenance complex component 4	-1.18688	8.56e-06
43528	membrane associated ring-CH-type finger 4	-1.1862	1.91e-05
RANBP1	RAN binding protein 1	-1.1845	1e-05
RPS7	ribosomal protein S7	-1.18431	4.24e-05
LMNB2	lamin B2	-1.18222	2.95e-05
HJURP	Holliday junction recognition protein	-1.18183	1.2e-05
FBXO5	F-box protein 5	-1.18153	3.66e-06
RRM1	ribonucleotide reductase catalytic subunit M1	-1.17981	8.2e-05
ITPRIP	inositol 1,4,5-trisphosphate receptor interacting protein	-1.17904	7.32e-06
CENPN	centromere protein N	-1.17534	1.72e-05
DKC1	dyskerin pseudouridine synthase 1	-1.17246	0.000131
FOXM1	forkhead box M1	-1.17101	2.29e-05
EBNA1BP2	EBNA1 binding protein 2	-1.16884	1.21e-05
DCBLD2	discoidin, CUB and LCCL domain containing 2	-1.16661	9.38e-06
CENPA	centromere protein A	-1.16356	2.67e-05
BDNF	brain derived neurotrophic factor	-1.16009	3.69e-06
TNFAIP3	TNF alpha induced protein 3	-1.15958	4.64e-05
DDX10	DEAD-box helicase 10	-1.15629	3.69e-05
PRKCA	protein kinase C alpha	-1.15089	0.000119
CDCA8	cell division cycle associated 8	-1.14929	9.46e-05
FIGNL1	fidgetin like 1	-1.14855	0.000291
SPC24	SPC24, NDC80 kinetochore complex component	-1.14781	3.11e-05
NOV	nephroblastoma overexpressed	-1.14744	3.82e-05
RACGAP1	Rac GTPase activating protein 1	-1.14486	0.000175
MARCKSL1	MARCKS like 1	-1.14138	0.000191
DLGAP5	DLG associated protein 5	-1.14081	0.000162
SPDL1	spindle apparatus coiled-coil protein 1	-1.13801	7.71e-05
PBK	PDZ binding kinase	-1.13742	1.47e-05
CENPW	centromere protein W	-1.13615	0.00285
CKS1B	CDC28 protein kinase regulatory subunit 1B	-1.13445	6.59e-05
TTK	TTK protein kinase	-1.13302	6.03e-05
LMNA	lamin A/C	-1.13256	2.31e-05
CSE1L	chromosome segregation 1 like	-1.13014	7.17e-06
NCAPG	non-SMC condensin I complex subunit G	-1.12631	0.00222
ZWINT	ZW10 interacting kinetochore protein	-1.12625	2.05e-05
HMOX1	heme oxygenase 1	-1.12489	0.000243
FOXQ1	forkhead box Q1	-1.12436	1.24e-05
RPL29	ribosomal protein L29	-1.12368	0.000169
RPS24	ribosomal protein S24	-1.12306	0.000159
UCK2	uridine-cytidine kinase 2	-1.12018	3.67e-06
OAF	out at first homolog	-1.11808	1.89e-05
KCTD5	potassium channel tetramerization domain containing 5	-1.11263	0.00178
DRAP1	DR1 associated protein 1	-1.11078	0.000557
TNFRSF12A	TNF receptor superfamily member 12A	-1.10964	0.00046
SERPINE1	serpin family E member 1	-1.10573	0.00412
TUBG1	tubulin gamma 1	-1.10424	1.68e-05
NUDT1	nudix hydrolase 1	-1.09949	0.000125
MELK	maternal embryonic leucine zipper kinase	-1.09765	1.32e-05
RAD51AP1	RAD51 associated protein 1	-1.09403	1.48e-05
WDR4	WD repeat domain 4	-1.09188	1.96e-05
ATAD3A	ATPase family, AAA domain containing 3A	-1.09183	0.00027
CBLB	Cbl proto-oncogene B	-1.08782	0.00123
RASA1	RAS p21 protein activator 1	-1.08622	3.05e-06
DNMT1	DNA (cytosine-5-)-methyltransferase 1	-1.08138	0.000161
NME1	NME/NM23 nucleoside diphosphate kinase 1	-1.07599	3.67e-06
PAICS	phosphoribosylaminoimidazole carboxylase; phosphoribosylaminoimidazolesuccinocarboxamide synthase	-1.07536	1.2e-05
HMMR	hyaluronan mediated motility receptor	-1.07429	3.1e-05
GATAD2A	GATA zinc finger domain containing 2A	-1.07252	4.97e-05
GLIPR2	GLI pathogenesis related 2	-1.07081	0.000447
EIF6	eukaryotic translation initiation factor 6	-1.07001	3.8e-06
ANLN	anillin actin binding protein	-1.06959	6.53e-05
CKAP2	cytoskeleton associated protein 2	-1.069	0.000182
AXL	AXL receptor tyrosine kinase	-1.06667	7.58e-06
COL5A1	collagen type V alpha 1 chain	-1.06581	0.000198
ATP6V0E2	ATPase H+ transporting V0 subunit e2	-1.0618	5.76e-06
ITIH3	inter-alpha-trypsin inhibitor heavy chain 3	-1.06149	0.000106
FXYD5	FXYD domain containing ion transport regulator 5	-1.05864	2.52e-05
EHD1	EH domain containing 1	-1.05757	0.0027
IGFBP6	insulin like growth factor binding protein 6	-1.0554	0.000248
FST	follistatin	-1.05157	0.000226
ADAM19	ADAM metallopeptidase domain 19	-1.04665	2e-05
SLIT2	slit guidance ligand 2	-1.0445	0.000193
ALDH1A3	aldehyde dehydrogenase 1 family member A3	-1.0434	7.66e-05
PORCN	porcupine homolog (Drosophila)	-1.04259	2.38e-05
EFHD2	EF-hand domain family member D2	-1.04228	4.58e-05
FABP5	fatty acid binding protein 5	-1.03856	1.28e-05
BUB1	BUB1 mitotic checkpoint serine/threonine kinase	-1.03825	2.86e-05
UBASH3B	ubiquitin associated and SH3 domain containing B	-1.03639	0.000846
NHS	NHS actin remodeling regulator	-1.03506	0.000103
TOMM40	translocase of outer mitochondrial membrane 40	-1.03447	0.000138
TPI1	triosephosphate isomerase 1	-1.03345	3.7e-05
IL7R	interleukin 7 receptor	-1.03132	5.54e-05
NEK7	NIMA related kinase 7	-1.02966	0.00113
SNRPB	small nuclear ribonucleoprotein polypeptides B and B1	-1.02857	1.89e-05
CKS2	CDC28 protein kinase regulatory subunit 2	-1.02585	2.38e-05
RCC2	regulator of chromosome condensation 2	-1.02447	0.000175
MCM6	minichromosome maintenance complex component 6	-1.02178	0.000106
FOSL1	FOS like 1, AP-1 transcription factor subunit	-1.02055	5.09e-05
UGDH	UDP-glucose 6-dehydrogenase	-1.02015	0.00147
TUBA3D	tubulin alpha 3d	-1.02011	0.0313
STRA13	stimulated by retinoic acid 13	-1.02006	0.000269
MCM2	minichromosome maintenance complex component 2	-1.01785	0.000231
SGK1	serum/glucocorticoid regulated kinase 1	-1.01778	0.00013
UBE2T	ubiquitin conjugating enzyme E2 T	-1.01643	0.000107
MTHFD1L	methylenetetrahydrofolate dehydrogenase (NADP+ dependent) 1-like	-1.01443	8.17e-06
CALB2	calbindin 2	-1.01134	2.66e-05
LSM5	LSM5 homolog, U6 small nuclear RNA and mRNA degradation associated	-1.01114	0.00411
IMP4	IMP4 homolog, U3 small nucleolar ribonucleoprotein	-1.00855	3.86e-05
EWSR1	EWS RNA binding protein 1	-1.00827	1.65e-05
CKAP4	cytoskeleton associated protein 4	-1.00317	8.42e-05
HNRNPD	heterogeneous nuclear ribonucleoprotein D	-1.00093	1.36e-05
EIF4A2	eukaryotic translation initiation factor 4A2	1.00197	7.8e-06
ADRA1B	adrenoceptor alpha 1B	1.00341	6.21e-06
EYA1	EYA transcriptional coactivator and phosphatase 1	1.00389	6.79e-05
LMBRD1	LMBR1 domain containing 1	1.00415	0.00013
C1RL	complement C1r subcomponent like	1.00467	0.000121
JAM2	junctional adhesion molecule 2	1.00627	8.44e-05
ZMYM6	zinc finger MYM-type containing 6	1.0081	2.37e-05
FGF7	fibroblast growth factor 7	1.01038	0.00252
CLEC3B	C-type lectin domain family 3 member B	1.01141	0.0144
ERP27	endoplasmic reticulum protein 27	1.01194	2.59e-05
NFE2L2	nuclear factor, erythroid 2 like 2	1.01781	1.22e-05
TFPI	tissue factor pathway inhibitor	1.01785	0.000123
ALCAM	activated leukocyte cell adhesion molecule	1.01929	0.0124
RARRES3	retinoic acid receptor responder 3	1.02103	0.000482
MAP2K2	mitogen-activated protein kinase kinase 2	1.02243	0.0012
SLC11A2	solute carrier family 11 member 2	1.02441	0.000599
GK5	glycerol kinase 5 (putative)	1.02569	0.000564
PC	pyruvate carboxylase	1.02633	0.00307
HTRA1	HtrA serine peptidase 1	1.02877	0.000645
DHCR7	7-dehydrocholesterol reductase	1.02899	3.21e-05
GALNT1	polypeptide N-acetylgalactosaminyltransferase 1	1.03045	0.000721
EFNB2	ephrin B2	1.03181	0.000397
MMD	monocyte to macrophage differentiation associated	1.03481	1.36e-05
TPP1	tripeptidyl peptidase 1	1.03498	0.000198
SLC25A51	solute carrier family 25 member 51	1.03855	0.00707
S100A13	S100 calcium binding protein A13	1.04164	0.000294
ZFP36L2	ZFP36 ring finger protein like 2	1.04454	2.46e-05
ANGPTL5	angiopoietin like 5	1.04471	2.41e-05
GGT5	gamma-glutamyltransferase 5	1.04543	1.84e-05
PIP	prolactin induced protein	1.04873	6.12e-06
PRELP	proline and arginine rich end leucine rich repeat protein	1.05094	0.000861
PLXNB1	plexin B1	1.06062	2.46e-05
IFITM2	interferon induced transmembrane protein 2	1.06074	0.000125
BEX3	brain expressed X-linked 3	1.06173	6.52e-06
GBE1	glucan (1,4-alpha-), branching enzyme 1	1.06244	8.97e-05
FOXN3	forkhead box N3	1.06255	4.75e-05
RAB11FIP1	RAB11 family interacting protein 1	1.06903	1.75e-05
TBCK	TBC1 domain containing kinase	1.07033	2.67e-05
KLHL24	kelch like family member 24	1.07196	9.77e-06
RAP1GAP	RAP1 GTPase activating protein	1.07381	9.07e-06
SFRP1	secreted frizzled related protein 1	1.07416	0.000312
CADM3	cell adhesion molecule 3	1.07716	6.15e-05
GADD45A	growth arrest and DNA damage inducible alpha	1.07779	1.39e-05
TTPAL	alpha tocopherol transfer protein like	1.07805	1.31e-05
TACSTD2	tumor-associated calcium signal transducer 2	1.07974	0.000531
PTGFR	prostaglandin F receptor	1.08018	0.00093
INSIG2	insulin induced gene 2	1.08178	6.15e-05
CYB5A	cytochrome b5 type A	1.0844	0.000273
SDCBP	syndecan binding protein	1.08891	9.3e-05
SLC6A11	solute carrier family 6 member 11	1.08935	0.00563
EPHX1	epoxide hydrolase 1	1.09394	2.02e-05
AGTR1	angiotensin II receptor type 1	1.09562	1.09e-05
LRP10	LDL receptor related protein 10	1.09973	0.0329
NNMT	nicotinamide N-methyltransferase	1.10153	0.00522
ADAMTSL4	ADAMTS like 4	1.1017	5.29e-05
FNBP1L	formin binding protein 1 like	1.10271	0.00339
QPRT	quinolinate phosphoribosyltransferase	1.10416	0.00011
COL12A1	collagen type XII alpha 1 chain	1.10774	0.000185
ALDOC	aldolase, fructose-bisphosphate C	1.11285	1.31e-05
RRAS	related RAS viral (r-ras) oncogene homolog	1.11291	6.3e-06
CTSD	cathepsin D	1.11708	4.75e-05
DKK1	dickkopf WNT signaling pathway inhibitor 1	1.12061	0.000819
GADD45B	growth arrest and DNA damage inducible beta	1.12481	1.48e-05
AEBP1	AE binding protein 1	1.12571	0.00227
PTGER4	prostaglandin E receptor 4	1.13592	1.82e-06
CHST7	carbohydrate sulfotransferase 7	1.13687	5.26e-06
SREBF1	sterol regulatory element binding transcription factor 1	1.1376	0.000214
ACTA2	actin, alpha 2, smooth muscle, aorta	1.14663	0.000255
RCBTB2	RCC1 and BTB domain containing protein 2	1.14766	7.22e-05
RABGAP1	RAB GTPase activating protein 1	1.14838	0.000566
PIK3IP1	phosphoinositide-3-kinase interacting protein 1	1.14885	1.31e-05
LPIN1	lipin 1	1.15572	0.000834
DSEL	dermatan sulfate epimerase-like	1.16391	8.53e-05
STAT5A	signal transducer and activator of transcription 5A	1.16409	2.43e-05
STON1	stonin 1	1.16879	4.79e-05
CPQ	carboxypeptidase Q	1.17125	3.22e-05
FMO2	flavin containing monooxygenase 2	1.17838	0.000156
MAP1LC3A	microtubule associated protein 1 light chain 3 alpha	1.18027	9.28e-05
PLA2G16	phospholipase A2 group XVI	1.18134	0.000246
FAP	fibroblast activation protein alpha	1.18218	5.96e-05
LSS	lanosterol synthase (2,3-oxidosqualene-lanosterol cyclase)	1.18626	0.000125
GBP2	guanylate binding protein 2	1.18688	2.16e-06
FOXO3	forkhead box O3	1.18824	0.000197
MT1M	metallothionein 1M	1.19275	2.89e-05
SERPINA3	serpin family A member 3	1.19665	1.25e-06
PDXK	pyridoxal (pyridoxine, vitamin B6) kinase	1.19803	0.000407
ITGA1	integrin subunit alpha 1	1.19804	0.000276
TMEM100	transmembrane protein 100	1.19895	5.6e-05
SLC25A23	solute carrier family 25 member 23	1.19924	3.82e-06
ANG	angiogenin	1.20185	4.9e-06
FAM46B	family with sequence similarity 46 member B	1.20432	5.53e-06
GPX1	glutathione peroxidase 1	1.20483	2.38e-05
PDGFRB	platelet derived growth factor receptor beta	1.20917	0.000249
HIST1H2AC	histone cluster 1, H2ac	1.20954	3.76e-06
MXD4	MAX dimerization protein 4	1.2113	0.000543
GPX4	glutathione peroxidase 4	1.2136	0.00128
SLC2A10	solute carrier family 2 member 10	1.21405	0.000371
CFLAR	CASP8 and FADD like apoptosis regulator	1.21541	3.21e-05
SELENBP1	selenium binding protein 1	1.22015	0.000208
KLF9	Kruppel like factor 9	1.22548	1.23e-05
HIST1H1C	histone cluster 1, H1c	1.22914	0.0181
LHFP	lipoma HMGIC fusion partner	1.23118	8.65e-06
ZFP36	ZFP36 ring finger protein	1.23507	0.000167
WISP2	WNT1 inducible signaling pathway protein 2	1.23531	8.34e-06
ARHGDIB	Rho GDP dissociation inhibitor beta	1.23849	0.000231
WASF3	WAS protein family member 3	1.24173	0.000372
HCFC1R1	host cell factor C1 regulator 1	1.24297	0.000174
HNMT	histamine N-methyltransferase	1.24716	0.000176
IFITM3	interferon induced transmembrane protein 3	1.25136	4.82e-05
HIST1H2BK	histone cluster 1, H2bk	1.25182	3.14e-05
FAM89A	family with sequence similarity 89 member A	1.25228	1.1e-05
C1R	complement C1r subcomponent	1.25268	0.000659
H2AFJ	H2A histone family member J	1.25491	5.38e-05
SLC44A1	solute carrier family 44 member 1	1.25504	0.000121
FCGRT	Fc fragment of IgG receptor and transporter	1.25772	1.5e-05
C1orf198	chromosome 1 open reading frame 198	1.26006	3.2e-06
SNAI2	snail family transcriptional repressor 2	1.26118	1.81e-05
RHOBTB3	Rho related BTB domain containing 3	1.26628	0.000511
NUPR1	nuclear protein 1, transcriptional regulator	1.26651	0.000677
GPD1L	glycerol-3-phosphate dehydrogenase 1-like	1.26792	5.06e-06
ARRDC2	arrestin domain containing 2	1.28108	0.000223
ANKRD35	ankyrin repeat domain 35	1.28414	1.28e-06
MSMO1	methylsterol monooxygenase 1	1.28473	0.000169
IFNGR1	interferon gamma receptor 1	1.28857	0.000113
OPTN	optineurin	1.28903	1.16e-05
NINJ2	ninjurin 2	1.29344	2.54e-05
F2R	coagulation factor II thrombin receptor	1.2952	5.46e-05
SORBS2	sorbin and SH3 domain containing 2	1.29718	0.000136
TWIST1	twist family bHLH transcription factor 1	1.30334	2.67e-06
ZMAT3	zinc finger matrin-type 3	1.30813	5.43e-05
PON2	paraoxonase 2	1.31517	1.05e-05
TCEAL3	transcription elongation factor A like 3	1.31801	9.44e-06
OPN3	opsin 3	1.31971	1.92e-06
EPS8	epidermal growth factor receptor pathway substrate 8	1.3265	4.2e-05
CCDC3	coiled-coil domain containing 3	1.33068	7.1e-07
LEPROT	leptin receptor overlapping transcript	1.33357	0.000258
TEX2	testis expressed 2	1.33539	0.000346
LUM	lumican	1.3364	6.35e-05
PTGER2	prostaglandin E receptor 2	1.3377	9.06e-07
PPP1R3C	protein phosphatase 1 regulatory subunit 3C	1.3426	1.85e-05
DHCR24	24-dehydrocholesterol reductase	1.34398	3.22e-05
PTPRM	protein tyrosine phosphatase, receptor type M	1.34705	0.000232
AFAP1L1	actin filament associated protein 1 like 1	1.34772	2.2e-06
DDIT4L	DNA damage inducible transcript 4 like	1.34928	5.42e-05
FADS1	fatty acid desaturase 1	1.35384	1.19e-05
GPM6B	glycoprotein M6B	1.3552	1.24e-05
MFGE8	milk fat globule-EGF factor 8 protein	1.35545	2.38e-05
C5	complement component 5	1.35766	5.52e-06
OSBPL10	oxysterol binding protein like 10	1.36927	7.3e-06
ALDH6A1	aldehyde dehydrogenase 6 family member A1	1.37353	7.98e-07
SUSD2	sushi domain containing 2	1.37901	0.000286
TMEM140	transmembrane protein 140	1.3793	8.33e-07
SH3BGRL	SH3 domain binding glutamate rich protein like	1.37952	3.65e-05
IMPA2	inositol monophosphatase 2	1.38823	0.000194
CTHRC1	collagen triple helix repeat containing 1	1.38856	2.36e-05
FOS	Fos proto-oncogene, AP-1 transcription factor subunit	1.38992	7.85e-07
METTL7A	methyltransferase like 7A	1.39012	0.00768
RNASE4	ribonuclease A family member 4	1.3939	2.14e-05
CCL13	C-C motif chemokine ligand 13	1.39416	1.3e-07
RENBP	renin binding protein	1.39612	4.74e-06
APOB	apolipoprotein B	1.39761	9.25e-07
ZNF106	zinc finger protein 106	1.40715	1.21e-05
C1S	complement component 1, s subcomponent	1.409	0.000201
SOD2	superoxide dismutase 2, mitochondrial	1.41329	8.44e-05
SMPDL3A	sphingomyelin phosphodiesterase acid like 3A	1.41485	0.000189
SLC44A2	solute carrier family 44 member 2	1.42402	7.85e-07
POSTN	periostin	1.42446	0.00042
MYO1D	myosin ID	1.43105	2.86e-05
ACSL1	acyl-CoA synthetase long-chain family member 1	1.44971	0.00201
STAT2	signal transducer and activator of transcription 2	1.45322	0.000158
LAMA2	laminin subunit alpha 2	1.4555	2.11e-05
CD302	CD302 molecule	1.47034	5.48e-06
PLAC9	placenta specific 9	1.47129	7.32e-06
PCSK5	proprotein convertase subtilisin/kexin type 5	1.47481	2.98e-05
HPS5	HPS5, biogenesis of lysosomal organelles complex 2 subunit 2	1.47956	3.75e-06
ABCA6	ATP binding cassette subfamily A member 6	1.48817	0.00015
COPS8	COP9 signalosome subunit 8	1.49155	0.000844
MOXD1	monooxygenase DBH like 1	1.49705	2.81e-05
RFTN2	raftlin family member 2	1.49975	2.43e-05
PRKD1	protein kinase D1	1.50155	4.44e-07
NEDD9	neural precursor cell expressed, developmentally down-regulated 9	1.51986	6.53e-05
COL8A2	collagen type VIII alpha 2 chain	1.52988	1.97e-05
BCL6	B-cell CLL/lymphoma 6	1.5351	5.23e-05
ARL6IP5	ADP ribosylation factor like GTPase 6 interacting protein 5	1.53626	0.000911
DCLK1	doublecortin like kinase 1	1.53774	3.82e-06
ACSS2	acyl-CoA synthetase short-chain family member 2	1.54849	1.64e-06
RPS29	ribosomal protein S29	1.5502	3.14e-06
HSPB1	heat shock protein family B (small) member 1	1.5523	0.00125
PIK3R1	phosphoinositide-3-kinase regulatory subunit 1	1.55655	9.06e-07
RANBP3L	RAN binding protein 3 like	1.56128	1.32e-05
COX7A1	cytochrome c oxidase subunit 7A1	1.56234	8.15e-05
PDGFD	platelet derived growth factor D	1.57148	1.6e-07
VIT	vitrin	1.57221	3.3e-07
NEXN	nexilin F-actin binding protein	1.5738	6.6e-06
SCPEP1	serine carboxypeptidase 1	1.58378	2.96e-06
ISM1	isthmin 1, angiogenesis inhibitor	1.59746	0.000215
TMEM119	transmembrane protein 119	1.59936	5.81e-06
ST6GAL1	ST6 beta-galactoside alpha-2,6-sialyltransferase 1	1.61489	0.000119
TSPAN18	tetraspanin 18	1.61578	2.09e-06
HSD11B1	hydroxysteroid 11-beta dehydrogenase 1	1.61629	1.88e-06
GABARAPL1	GABA type A receptor associated protein like 1	1.6262	1.36e-05
RAB31	RAB31, member RAS oncogene family	1.63756	4.31e-05
ENDOD1	endonuclease domain containing 1	1.64335	4.95e-06
RPS6KA2	ribosomal protein S6 kinase A2	1.6464	4.39e-05
FASN	fatty acid synthase	1.66681	0.000112
RECK	reversion inducing cysteine rich protein with kazal motifs	1.66723	2.67e-06
ADCY3	adenylate cyclase 3	1.67046	5.37e-06
IGF2	insulin like growth factor 2	1.67402	6.7e-07
PDE1A	phosphodiesterase 1A	1.68583	1.84e-07
TCEAL4	transcription elongation factor A like 4	1.68803	2.67e-05
CERS6	ceramide synthase 6	1.69807	2.49e-06
SH3D19	SH3 domain containing 19	1.70948	3.3e-07
ABCC3	ATP binding cassette subfamily C member 3	1.72469	4.64e-05
SEPP1	selenoprotein P, plasma, 1	1.74731	0.00102
SPRY1	sprouty RTK signaling antagonist 1	1.74984	1.26e-06
OSBPL5	oxysterol binding protein like 5	1.75454	5.06e-06
DPT	dermatopontin	1.77462	1.15e-06
CEBPD	CCAAT/enhancer binding protein delta	1.78737	3.3e-07
PODN	podocan	1.78762	1.4e-05
GSN	gelsolin	1.79726	8.65e-06
TNS3	tensin 3	1.80786	8.63e-06
SERPING1	serpin family G member 1	1.81645	9.03e-05
KCNT2	potassium sodium-activated channel subfamily T member 2	1.82112	1.75e-06
SLC35F5	solute carrier family 35 member F5	1.82625	2.67e-05
PLSCR4	phospholipid scramblase 4	1.83803	3.43e-06
FZD4	frizzled class receptor 4	1.84622	2.96e-06
C1QTNF5	C1q and tumor necrosis factor related protein 5	1.85997	0.000106
PCDH18	protocadherin 18	1.87364	3.6e-07
PTN	pleiotrophin	1.8746	7.4e-06
OLFML3	olfactomedin like 3	1.89181	1.32e-05
GPC4	glypican 4	1.89652	1.2e-05
TMEM204	transmembrane protein 204	1.90032	2.41e-06
MAN1C1	mannosidase alpha class 1C member 1	1.92657	3.17e-06
RASD1	ras related dexamethasone induced 1	1.94822	1.52e-06
GPNMB	glycoprotein nmb	1.95601	4.43e-06
APOE	apolipoprotein E	1.96067	0.000292
ALPL	alkaline phosphatase, liver/bone/kidney	1.97503	3.83e-07
ABCA8	ATP binding cassette subfamily A member 8	1.98032	2.46e-05
CAMK2N1	calcium/calmodulin dependent protein kinase II inhibitor 1	1.98677	1.15e-06
CRYAB	crystallin alpha B	1.99598	1.96e-05
ITGA10	integrin subunit alpha 10	2.03203	1.68e-05
SORT1	sortilin 1	2.03854	2.67e-07
NR2F1	nuclear receptor subfamily 2 group F member 1	2.04851	9.88e-08
PDGFRL	platelet derived growth factor receptor like	2.05567	1.32e-06
DDIT4	DNA damage inducible transcript 4	2.0605	1.22e-06
SERPINF1	serpin family F member 1	2.06112	0.000202
FBLN2	fibulin 2	2.072	1.02e-07
LMCD1	LIM and cysteine rich domains 1	2.07431	3.35e-06
IFITM1	interferon induced transmembrane protein 1	2.08039	1.43e-06
SLC40A1	solute carrier family 40 member 1	2.08209	1.31e-08
MFAP4	microfibrillar associated protein 4	2.11138	1.75e-06
TRNP1	TMF1-regulated nuclear protein 1	2.12682	2e-06
MTSS1	metastasis suppressor 1	2.12708	3.63e-08
STMN2	stathmin 2	2.12747	1.39e-08
CYBRD1	cytochrome b reductase 1	2.15319	5.47e-07
IRS2	insulin receptor substrate 2	2.16066	3.05e-06
GAS6	growth arrest specific 6	2.17148	5.57e-06
CMTM8	CKLF like MARVEL transmembrane domain containing 8	2.18468	3.3e-06
ADM	adrenomedullin	2.20026	1.33e-05
SLC46A3	solute carrier family 46 member 3	2.20054	2.61e-06
ADH1B	alcohol dehydrogenase 1B (class I), beta polypeptide	2.20149	1.17e-06
FOXO1	forkhead box O1	2.21017	3.1e-05
SRPX	sushi repeat containing protein, X-linked	2.25516	2.79e-06
ECM2	extracellular matrix protein 2	2.26088	9.32e-08
SAT1	spermidine/spermine N1-acetyltransferase 1	2.2739	2e-06
IGFBP2	insulin like growth factor binding protein 2	2.27539	3.3e-05
TMTC1	transmembrane and tetratricopeptide repeat containing 1	2.30896	4.3e-06
SAA1	serum amyloid A1	2.32032	0.000195
COL7A1	collagen type VII alpha 1 chain	2.34867	1.89e-05
PTGDS	prostaglandin D2 synthase	2.35915	1.75e-06
FBLN5	fibulin 5	2.3811	8.07e-08
FMO3	flavin containing monooxygenase 3	2.38294	9.36e-08
TXNIP	thioredoxin interacting protein	2.41855	0.00489
ZBTB16	zinc finger and BTB domain containing 16	2.43447	3.3e-07
GAS1	growth arrest specific 1	2.43723	1.32e-05
TIMP4	TIMP metallopeptidase inhibitor 4	2.49689	1.19e-07
CTSK	cathepsin K	2.50291	1.11e-06
PROS1	protein S (alpha)	2.56702	1.28e-06
AOX1	aldehyde oxidase 1	2.60448	3.73e-07
GCHFR	GTP cyclohydrolase I feedback regulator	2.61966	2.2e-06
PPARG	peroxisome proliferator activated receptor gamma	2.62142	1.15e-07
FBXO32	F-box protein 32	2.6271	9.93e-07
SCD	stearoyl-CoA desaturase	2.66002	1.82e-06
CD24	CD24 molecule	2.69288	1.32e-07
C10orf10	chromosome 10 open reading frame 10	2.6965	9.32e-08
DUSP23	dual specificity phosphatase 23	2.73458	1.32e-07
RAP2A	RAP2A, member of RAS oncogene family	2.74685	5.3e-07
CFH	complement factor H	2.7582	2.8e-07
COL8A1	collagen type VIII alpha 1 chain	2.85437	5.34e-08
DCN	decorin	2.85585	1.28e-07
HOPX	HOP homeobox	2.87303	6.98e-09
EFHD1	EF-hand domain family member D1	2.89373	1.09e-07
SVEP1	sushi, von Willebrand factor type A, EGF and pentraxin domain containing 1	2.91048	2.15e-06
ADARB1	adenosine deaminase, RNA specific B1	2.9631	1.22e-06
ANGPT1	angiopoietin 1	2.96633	1.6e-07
TSC22D3	TSC22 domain family member 3	2.99958	1.31e-08
MMP7	matrix metallopeptidase 7	3.02551	1.81e-09
PPP1R14A	protein phosphatase 1 regulatory inhibitor subunit 14A	3.03145	1.6e-08
CD14	CD14 molecule	3.04437	2.98e-07
COMP	cartilage oligomeric matrix protein	3.07788	2.68e-07
MT1X	metallothionein 1X	3.09185	7.91e-08
CORIN	corin, serine peptidase	3.16148	6.47e-07
FBN2	fibrillin 2	3.1794	4.9e-06
OMD	osteomodulin	3.20361	3.83e-07
FBLN1	fibulin 1	3.23032	8.3e-07
OLFML2A	olfactomedin like 2A	3.57879	4.89e-07
RGCC	regulator of cell cycle	3.71456	1.42e-07
LEPR	leptin receptor	3.87736	3.06e-08
CFD	complement factor D	3.91347	3.3e-07
MME	membrane metallo-endopeptidase	3.92101	5.29e-08
FKBP5	FK506 binding protein 5	3.95493	3.76e-09
CIDEC	cell death inducing DFFA like effector c	4.10874	1.32e-09
MAOA	monoamine oxidase A	4.12874	7.98e-09
LEP	leptin	4.14445	6.88e-09
GPX3	glutathione peroxidase 3	4.19749	1.32e-09
ADH1A	alcohol dehydrogenase 1A (class I), alpha polypeptide	4.58312	1.81e-09
MGP	matrix Gla protein	4.6595	8.03e-10
FRZB	frizzled-related protein	4.66686	1.32e-09
COL11A1	collagen type XI alpha 1 chain	4.97411	1.32e-09
APOD	apolipoprotein D	6.87272	1.39e-08

## Sheet: 25VS0-adj.P.valu<0.05-|logFC|>1
The list of DEGS in COs cultured for 25 days with calcified medium
Gene.symbol	Gene name	logFC	adj.P.Val
CXCL12	C-X-C motif chemokine ligand 12	-3.65817	3.25e-09
PHGDH	phosphoglycerate dehydrogenase	-3.62494	3.44e-08
KRT19	keratin 19	-3.4285	2.12e-09
GREM1	gremlin 1, DAN family BMP antagonist	-3.26403	3.2e-08
TUBB3	tubulin beta 3 class III	-3.17692	4.14e-10
PSAT1	phosphoserine aminotransferase 1	-2.8665	6.04e-09
IL6	interleukin 6	-2.84533	1.42e-09
IER3	immediate early response 3	-2.80078	1.34e-08
KRT34	keratin 34	-2.74683	2.46e-08
C11orf87	chromosome 11 open reading frame 87	-2.62194	2.27e-09
TGFBI	transforming growth factor beta induced	-2.57156	1.02e-08
ASNS	asparagine synthetase (glutamine-hydrolyzing)	-2.55593	2.36e-07
SLC7A5	solute carrier family 7 member 5	-2.49794	1.21e-07
NGF	nerve growth factor	-2.42563	3.36e-09
NRG1	neuregulin 1	-2.42276	3.85e-09
MALL	mal, T-cell differentiation protein like	-2.41566	3.21e-09
UHRF1	ubiquitin like with PHD and ring finger domains 1	-2.40865	1.02e-08
FLG	filaggrin	-2.38129	6.4e-08
NTN4	netrin 4	-2.31897	8.92e-08
RAC2	ras-related C3 botulinum toxin substrate 2 (rho family, small GTP binding protein Rac2)	-2.31198	5.13e-08
HAS2	hyaluronan synthase 2	-2.31091	3.01e-07
PODXL	podocalyxin like	-2.27468	7.79e-08
ID2	inhibitor of DNA binding 2, HLH protein	-2.26797	4.82e-08
NREP	neuronal regeneration related protein	-2.2618	9.68e-09
FLNC	filamin C	-2.23977	3.02e-06
ALPK2	alpha kinase 2	-2.22766	6.11e-08
RGS4	regulator of G-protein signaling 4	-2.19868	9.32e-08
ADIRF	adipogenesis regulatory factor	-2.1964	1.24e-07
CDC20	cell division cycle 20	-2.17049	1.32e-09
ODC1	ornithine decarboxylase 1	-2.13851	2.8e-08
CD44	CD44 molecule (Indian blood group)	-2.13216	4.4e-08
PFKP	phosphofructokinase, platelet	-2.12983	5.45e-08
EVA1A	eva-1 homolog A, regulator of programmed cell death	-2.12628	2.89e-09
FNDC1	fibronectin type III domain containing 1	-2.12107	5.6e-08
CLDN11	claudin 11	-2.07489	1.55e-07
PTTG1	pituitary tumor-transforming 1	-2.02351	1.45e-07
KIAA0101	KIAA0101	-2.0199	1.45e-07
SHISA2	shisa family member 2	-2.00868	8.8e-09
TK1	thymidine kinase 1	-1.98752	1.01e-08
WNT5A	Wnt family member 5A	-1.91695	4.2e-07
UBE2C	ubiquitin conjugating enzyme E2 C	-1.90193	4.09e-08
RGMB	repulsive guidance molecule family member b	-1.89494	1.55e-08
TYMS	thymidylate synthetase	-1.87313	1.4e-07
UGCG	UDP-glucose ceramide glucosyltransferase	-1.85078	2.52e-08
DPYSL3	dihydropyrimidinase like 3	-1.83773	4.64e-08
SNAR-A1	small ILF3/NF90-associated RNA A1	-1.82585	9.87e-06
GABBR2	gamma-aminobutyric acid type B receptor subunit 2	-1.80159	4.2e-08
PRC1	protein regulator of cytokinesis 1	-1.79968	2.31e-07
ADAMTS1	ADAM metallopeptidase with thrombospondin type 1 motif 1	-1.78232	3.41e-08
MCM7	minichromosome maintenance complex component 7	-1.77545	2.53e-07
PHLDA1	pleckstrin homology like domain family A member 1	-1.7709	9.04e-08
HIST1H4C	histone cluster 1, H4c	-1.76755	1.45e-07
GINS2	GINS complex subunit 2	-1.7659	8.02e-09
LDB2	LIM domain binding 2	-1.7579	1.4e-07
TOP2A	topoisomerase (DNA) II alpha	-1.74562	1.49e-06
PTTG3P	pituitary tumor-transforming 3, pseudogene	-1.74103	4.44e-07
TMEM158	transmembrane protein 158 (gene/pseudogene)	-1.72467	3.68e-08
PLAUR	plasminogen activator, urokinase receptor	-1.68393	1.41e-08
PRRX2	paired related homeobox 2	-1.66386	7.81e-09
HBEGF	heparin binding EGF like growth factor	-1.66384	2.03e-07
LPXN	leupaxin	-1.65668	5.16e-08
SLC7A1	solute carrier family 7 member 1	-1.63464	7.81e-08
CPA4	carboxypeptidase A4	-1.63106	2.62e-07
FHL2	four and a half LIM domains 2	-1.62584	3.12e-09
TRIP13	thyroid hormone receptor interactor 13	-1.62437	1.79e-08
FEN1	flap structure-specific endonuclease 1	-1.61697	2.05e-07
FOXD1	forkhead box D1	-1.60537	2.98e-07
NUDT1	nudix hydrolase 1	-1.59693	4.45e-08
SYNCRIP	synaptotagmin binding cytoplasmic RNA interacting protein	-1.58644	2.44e-07
SEL1L3	SEL1L family member 3	-1.57997	9.41e-08
GPR68	G protein-coupled receptor 68	-1.57876	2.47e-08
BIRC5	baculoviral IAP repeat containing 5	-1.5749	8.05e-08
FLNB	filamin B	-1.57373	4.19e-07
LMNA	lamin A/C	-1.56973	2.2e-07
HMGA1	high mobility group AT-hook 1	-1.56019	1.42e-07
DRAP1	DR1 associated protein 1	-1.55924	8.98e-06
MAD2L1	MAD2 mitotic arrest deficient-like 1 (yeast)	-1.55295	3.77e-07
MOK	MOK protein kinase	-1.54636	6.63e-07
CCNB2	cyclin B2	-1.53413	1.19e-06
FXYD5	FXYD domain containing ion transport regulator 5	-1.53409	2.28e-08
PPP1R14B	protein phosphatase 1 regulatory inhibitor subunit 14B	-1.53286	3.07e-07
ELN	elastin	-1.5313	3.58e-06
TRMT5	tRNA methyltransferase 5	-1.52352	1.42e-06
APCDD1L	APC down-regulated 1 like	-1.52129	3.97e-07
CDC45	cell division cycle 45	-1.51689	5e-07
FAM64A	family with sequence similarity 64 member A	-1.51256	2.33e-07
CRABP2	cellular retinoic acid binding protein 2	-1.51013	9.68e-08
GLIPR1	GLI pathogenesis related 1	-1.49746	1.23e-07
DNAJC9	DnaJ heat shock protein family (Hsp40) member C9	-1.49387	1.57e-06
GPER1	G protein-coupled estrogen receptor 1	-1.48787	1.22e-07
NQO1	NAD(P)H quinone dehydrogenase 1	-1.48589	4.71e-08
TUBB4B	tubulin beta 4B class IVb	-1.4842	5.51e-06
IGFBP6	insulin like growth factor binding protein 6	-1.47989	2.1e-07
AURKA	aurora kinase A	-1.47944	1.94e-07
EBNA1BP2	EBNA1 binding protein 2	-1.47602	5.51e-08
UBASH3B	ubiquitin associated and SH3 domain containing B	-1.46948	6.41e-07
MDK	midkine (neurite growth-promoting factor 2)	-1.46025	2.39e-07
LOX	lysyl oxidase	-1.45757	1.82e-07
H2AFZ	H2A histone family member Z	-1.45487	8.63e-08
HAPLN1	hyaluronan and proteoglycan link protein 1	-1.45	3.23e-06
EIF6	eukaryotic translation initiation factor 6	-1.44578	7.45e-09
AURKB	aurora kinase B	-1.44356	2.52e-07
NEK7	NIMA related kinase 7	-1.44133	7.78e-06
CDCA5	cell division cycle associated 5	-1.43755	1.1e-07
RCAN1	regulator of calcineurin 1	-1.43574	3.4e-06
FRMD6	FERM domain containing 6	-1.42389	7.88e-07
PNP	purine nucleoside phosphorylase	-1.40546	1.18e-07
ASPM	abnormal spindle microtubule assembly	-1.40373	2.74e-06
CRIP1	cysteine rich protein 1	-1.39532	1.49e-05
FGFRL1	fibroblast growth factor receptor-like 1	-1.39521	3.26e-06
C1QBP	complement C1q binding protein	-1.38842	4.7e-07
HPCAL1	hippocalcin like 1	-1.38348	1.37e-08
DCBLD2	discoidin, CUB and LCCL domain containing 2	-1.3814	4.52e-07
BDNF	brain derived neurotrophic factor	-1.37918	5.16e-08
KIF20A	kinesin family member 20A	-1.37672	2.03e-07
WARS	tryptophanyl-tRNA synthetase	-1.37413	2.46e-08
C7orf50	chromosome 7 open reading frame 50	-1.36667	3.38e-06
EIF5A	eukaryotic translation initiation factor 5A	-1.35957	7.27e-08
IL7R	interleukin 7 receptor	-1.3586	1.91e-06
TUBB	tubulin beta class I	-1.35455	1.31e-06
PAFAH1B3	platelet activating factor acetylhydrolase 1b catalytic subunit 3	-1.34775	2.36e-06
KRTAP1-5	keratin associated protein 1-5	-1.34747	2.35e-07
NCEH1	neutral cholesterol ester hydrolase 1	-1.34137	1.91e-06
EXT1	exostosin glycosyltransferase 1	-1.33937	1.8e-07
FAM83D	family with sequence similarity 83 member D	-1.3285	2.92e-06
FAM129A	family with sequence similarity 129 member A	-1.32577	6.78e-07
SRSF2	serine and arginine rich splicing factor 2	-1.31935	6.11e-07
SAC3D1	SAC3 domain containing 1	-1.31764	1.08e-06
DLGAP5	DLG associated protein 5	-1.31159	5.92e-06
TMEM200A	transmembrane protein 200A	-1.3103	1.87e-06
TM4SF1	transmembrane 4 L six family member 1	-1.30928	2.42e-07
43528	membrane associated ring-CH-type finger 4	-1.30876	4.09e-08
SOX11	SRY-box 11	-1.30785	1e-07
KCNK2	potassium two pore domain channel subfamily K member 2	-1.30751	1.37e-06
LONP1	lon peptidase 1, mitochondrial	-1.30628	7.2e-05
CENPF	centromere protein F	-1.30175	7.78e-06
SHMT2	serine hydroxymethyltransferase 2	-1.29894	2.52e-07
STAT4	signal transducer and activator of transcription 4	-1.2964	1.12e-07
HMGN2	high mobility group nucleosomal binding domain 2	-1.29094	0.000893
CCNA2	cyclin A2	-1.29007	1.62e-06
RPS24	ribosomal protein S24	-1.28213	8.98e-06
GAPDH	glyceraldehyde-3-phosphate dehydrogenase	-1.27651	1.91e-07
FIGNL1	fidgetin like 1	-1.27532	1.53e-05
COL5A1	collagen type V alpha 1 chain	-1.27501	7.45e-06
CKAP2L	cytoskeleton associated protein 2 like	-1.26423	5.35e-06
DNMT1	DNA (cytosine-5-)-methyltransferase 1	-1.26289	2.38e-06
MCM3	minichromosome maintenance complex component 3	-1.26212	3.81e-06
FBXO5	F-box protein 5	-1.25553	2.14e-08
KIF11	kinesin family member 11	-1.25334	2.61e-06
TUBA1C	tubulin alpha 1c	-1.24604	1.14e-07
FTSJ1	FtsJ RNA methyltransferase homolog 1 (E. coli)	-1.24447	3.58e-06
NME1	NME/NM23 nucleoside diphosphate kinase 1	-1.24354	7.25e-07
E2F7	E2F transcription factor 7	-1.23916	8.16e-07
ENPP2	ectonucleotide pyrophosphatase/phosphodiesterase 2	-1.23654	8.98e-06
BDKRB1	bradykinin receptor B1	-1.23587	1.13e-06
ABL1	ABL proto-oncogene 1, non-receptor tyrosine kinase	-1.23548	1.19e-05
RANBP1	RAN binding protein 1	-1.23274	3.49e-07
RPL29	ribosomal protein L29	-1.22789	3.82e-06
STAT1	signal transducer and activator of transcription 1	-1.22235	6.37e-06
CENPN	centromere protein N	-1.22151	1.03e-06
DKC1	dyskerin pseudouridine synthase 1	-1.22044	1.88e-05
CARD10	caspase recruitment domain family member 10	-1.21675	4.01e-08
SMAD3	SMAD family member 3	-1.21328	3.08e-06
STMN1	stathmin 1	-1.2122	3.04e-07
CENPW	centromere protein W	-1.21023	1.6e-05
PAICS	phosphoribosylaminoimidazole carboxylase; phosphoribosylaminoimidazolesuccinocarboxamide synthase	-1.20746	2.17e-07
PRELID1	PRELI domain containing 1	-1.20325	2.29e-05
HMOX1	heme oxygenase 1	-1.20097	5.39e-05
C19orf48	chromosome 19 open reading frame 48	-1.19797	5.94e-07
SMS	spermine synthase	-1.19464	1.52e-07
PCK2	phosphoenolpyruvate carboxykinase 2, mitochondrial	-1.19285	6.15e-07
CSRP1	cysteine and glycine rich protein 1	-1.19268	4.77e-05
RPS7	ribosomal protein S7	-1.18752	3.35e-06
ITIH3	inter-alpha-trypsin inhibitor heavy chain 3	-1.18503	8.52e-06
MARCKSL1	MARCKS like 1	-1.1834	2.85e-06
TOMM40	translocase of outer mitochondrial membrane 40	-1.18177	2.19e-06
NHS	NHS actin remodeling regulator	-1.17832	1.61e-05
POC1A	POC1 centriolar protein A	-1.16842	1.35e-06
TPI1	triosephosphate isomerase 1	-1.1656	1.3e-07
PRKCA	protein kinase C alpha	-1.16557	4.19e-05
TUBA1A	tubulin alpha 1a	-1.16226	1.88e-05
SNRPB	small nuclear ribonucleoprotein polypeptides B and B1	-1.15917	3.14e-07
EHD1	EH domain containing 1	-1.15561	1.5e-05
HNRNPD	heterogeneous nuclear ribonucleoprotein D	-1.15131	7.2e-06
SLC1A5	solute carrier family 1 member 5	-1.15006	8.72e-05
PLAT	plasminogen activator, tissue type	-1.13993	1.42e-06
NOV	nephroblastoma overexpressed	-1.13883	4.69e-06
RAD51AP1	RAD51 associated protein 1	-1.13781	2.93e-07
PBK	PDZ binding kinase	-1.13766	3.37e-06
CDCA8	cell division cycle associated 8	-1.13712	3.58e-06
S100A16	S100 calcium binding protein A16	-1.13648	6.4e-06
VEGFC	vascular endothelial growth factor C	-1.1352	5.6e-08
MCM4	minichromosome maintenance complex component 4	-1.13519	1.82e-07
DDX39A	DEAD-box helicase 39A	-1.13438	4.7e-07
IMPDH2	inosine monophosphate dehydrogenase 2	-1.12874	8.67e-07
CEP55	centrosomal protein 55	-1.1267	0.000563
MRPL12	mitochondrial ribosomal protein L12	-1.12527	7.35e-08
EFHD2	EF-hand domain family member D2	-1.12126	2.07e-06
PYCR1	pyrroline-5-carboxylate reductase 1	-1.12119	4.59e-05
SPARC	secreted protein acidic and cysteine rich	-1.11687	1.3e-05
MCM2	minichromosome maintenance complex component 2	-1.11497	2.55e-05
WDR18	WD repeat domain 18	-1.11479	2.5e-06
TNFAIP3	TNF alpha induced protein 3	-1.11396	9.61e-06
MTHFD1L	methylenetetrahydrofolate dehydrogenase (NADP+ dependent) 1-like	-1.11154	2.92e-07
GARS	glycyl-tRNA synthetase	-1.10823	1.84e-05
CDCA3	cell division cycle associated 3	-1.10775	6.21e-05
KRT14	keratin 14	-1.10767	4.35e-05
BZW2	basic leucine zipper and W2 domains 2	-1.10578	8.77e-06
ANLN	anillin actin binding protein	-1.10322	1.27e-06
CCDC34	coiled-coil domain containing 34	-1.09027	1.52e-06
UGDH	UDP-glucose 6-dehydrogenase	-1.08997	0.000145
BUB1	BUB1 mitotic checkpoint serine/threonine kinase	-1.08411	5.3e-06
CABLES1	Cdk5 and Abl enzyme substrate 1	-1.08275	4.9e-07
CBS	cystathionine-beta-synthase	-1.08183	9.28e-06
ITPRIP	inositol 1,4,5-trisphosphate receptor interacting protein	-1.08132	4.15e-06
EWSR1	EWS RNA binding protein 1	-1.07969	1.14e-06
KRT7	keratin 7	-1.07944	5.4e-06
CKS1B	CDC28 protein kinase regulatory subunit 1B	-1.07828	1.97e-05
ALDH1A3	aldehyde dehydrogenase 1 family member A3	-1.07484	7.27e-05
PAM16	presequence translocase associated motor 16 homolog	-1.07221	1.01e-06
FOXM1	forkhead box M1	-1.07204	4.38e-07
SLIT3	slit guidance ligand 3	-1.07055	5.91e-06
QSOX1	quiescin sulfhydryl oxidase 1	-1.06993	0.000213
TBC1D2	TBC1 domain family member 2	-1.06917	1.69e-06
LARP6	La ribonucleoprotein domain family member 6	-1.06863	3.46e-05
UCK2	uridine-cytidine kinase 2	-1.06626	2.16e-06
DCTPP1	dCTP pyrophosphatase 1	-1.06394	6.47e-05
PORCN	porcupine homolog (Drosophila)	-1.06127	1.36e-05
SPHK1	sphingosine kinase 1	-1.05888	7.18e-06
RBM14	RNA binding motif protein 14	-1.05835	1.19e-06
CENPM	centromere protein M	-1.05724	2.18e-06
OAF	out at first homolog	-1.05365	1.56e-07
YARS	tyrosyl-tRNA synthetase	-1.05141	1.04e-05
FAM107B	family with sequence similarity 107 member B	-1.04925	0.000106
MCM6	minichromosome maintenance complex component 6	-1.0482	1.69e-06
TTK	TTK protein kinase	-1.04795	1.51e-05
RFC4	replication factor C subunit 4	-1.04789	4.23e-06
OCIAD2	OCIA domain containing 2	-1.04682	3.32e-05
RASA1	RAS p21 protein activator 1	-1.04341	4.75e-07
RRP7A	ribosomal RNA processing 7 homolog A	-1.04244	6.92e-06
HNRNPA2B1	heterogeneous nuclear ribonucleoprotein A2/B1	-1.03968	2.37e-05
TNFRSF12A	TNF receptor superfamily member 12A	-1.03936	5.84e-05
SPC24	SPC24, NDC80 kinetochore complex component	-1.03851	8.29e-06
TUBB6	tubulin beta 6 class V	-1.03797	2.85e-05
HERC4	HECT and RLD domain containing E3 ubiquitin protein ligase 4	-1.03546	1.13e-05
MCM10	minichromosome maintenance 10 replication initiation factor	-1.03478	1.31e-05
ENG	endoglin	-1.03434	0.000568
HNRNPA1P10	heterogeneous nuclear ribonucleoprotein A1 pseudogene 10	-1.03393	1.63e-05
FOSL1	FOS like 1, AP-1 transcription factor subunit	-1.0335	6.64e-06
PITX1	paired like homeodomain 1	-1.03343	1.32e-05
TUBA3D	tubulin alpha 3d	-1.03335	0.0126
LMNB2	lamin B2	-1.02977	2.04e-07
NETO2	neuropilin and tolloid like 2	-1.02904	5.72e-07
FOXQ1	forkhead box Q1	-1.02577	1.89e-06
EGFLAM	EGF like, fibronectin type III and laminin G domains	-1.02512	5.19e-06
BCYRN1	brain cytoplasmic RNA 1	-1.02375	0.000708
RACGAP1	Rac GTPase activating protein 1	-1.02262	3.75e-05
AXL	AXL receptor tyrosine kinase	-1.01966	5.01e-07
CSRNP1	cysteine and serine rich nuclear protein 1	-1.01751	3.78e-07
NCAPG	non-SMC condensin I complex subunit G	-1.01694	8.21e-05
SH2B3	SH2B adaptor protein 3	-1.01691	2.18e-06
LZTS1	leucine zipper tumor suppressor 1	-1.01673	3.47e-06
ADGRG1	adhesion G protein-coupled receptor G1	-1.01668	5.59e-06
ATAD3A	ATPase family, AAA domain containing 3A	-1.01601	7.61e-05
CDH13	cadherin 13	-1.01479	2.41e-06
ZMIZ1	zinc finger MIZ-type containing 1	-1.01154	3.49e-07
SYNJ2	synaptojanin 2	-1.01132	9.52e-06
NEK2	NIMA related kinase 2	-1.01114	0.000152
PTGES	prostaglandin E synthase	-1.01112	9.78e-06
AIMP2	aminoacyl tRNA synthetase complex interacting multifunctional protein 2	-1.01076	1.16e-06
EIF4G1	eukaryotic translation initiation factor 4 gamma 1	-1.00777	0.000253
CDCA4	cell division cycle associated 4	-1.00772	2.04e-07
RRM1	ribonucleotide reductase catalytic subunit M1	-1.00749	8.56e-07
CIRBP	cold inducible RNA binding protein	-1.00396	1.5e-05
THBS1	thrombospondin 1	1.00079	7.14e-06
NFE2L2	nuclear factor, erythroid 2 like 2	1.0019	6.89e-07
ENPP5	ectonucleotide pyrophosphatase/phosphodiesterase 5 (putative)	1.00378	1.26e-07
MATN3	matrilin 3	1.00393	1e-05
N4BP2L2	NEDD4 binding protein 2 like 2	1.00605	1.94e-06
HIGD1A	HIG1 hypoxia inducible domain family member 1A	1.00637	2.74e-06
GNS	glucosamine (N-acetyl)-6-sulfatase	1.00937	6.26e-05
HIST1H4H	histone cluster 1, H4h	1.01087	5.31e-07
ST3GAL5	ST3 beta-galactoside alpha-2,3-sialyltransferase 5	1.01204	2e-07
USP53	ubiquitin specific peptidase 53	1.01814	6.12e-07
TMEM178A	transmembrane protein 178A	1.02203	1.49e-06
KLHL3	kelch like family member 3	1.02384	3.16e-07
ARHGAP24	Rho GTPase activating protein 24	1.0294	0.000147
FTH1	ferritin heavy chain 1	1.02956	3.01e-05
PLD3	phospholipase D family member 3	1.03059	3.86e-06
NPR3	natriuretic peptide receptor 3	1.03247	4.87e-06
NCAM2	neural cell adhesion molecule 2	1.03324	1.63e-07
RARRES3	retinoic acid receptor responder 3	1.03621	2.37e-05
FOXN3	forkhead box N3	1.03902	1.92e-06
TOX2	TOX high mobility group box family member 2	1.0395	6.44e-05
ACACB	acetyl-CoA carboxylase beta	1.04129	9.47e-06
TMBIM1	transmembrane BAX inhibitor motif containing 1	1.04223	0.000117
EFR3A	EFR3 homolog A	1.0432	4.69e-06
43712	septin 4	1.04368	4.31e-07
CYP27A1	cytochrome P450 family 27 subfamily A member 1	1.04418	1.4e-05
RASL11B	RAS like family 11 member B	1.04548	2.17e-05
SLC38A4	solute carrier family 38 member 4	1.04785	2.34e-07
TSPAN9	tetraspanin 9	1.04929	2.47e-06
CFLAR	CASP8 and FADD like apoptosis regulator	1.05064	0.000168
CD99L2	CD99 molecule like 2	1.05568	1.99e-05
PRCP	prolylcarboxypeptidase	1.05644	8.08e-07
SSBP2	single stranded DNA binding protein 2	1.0569	1.94e-07
EYA1	EYA transcriptional coactivator and phosphatase 1	1.06175	2.47e-05
PQLC3	PQ loop repeat containing 3	1.06289	6.04e-07
SCD5	stearoyl-CoA desaturase 5	1.06578	7.21e-06
LPIN1	lipin 1	1.06941	1.09e-05
MIOS	meiosis regulator for oocyte development	1.07209	2.07e-06
SLC26A6	solute carrier family 26 member 6	1.07313	2.34e-05
DDIT4L	DNA damage inducible transcript 4 like	1.07405	5.02e-06
ELL2	elongation factor for RNA polymerase II 2	1.07706	4.44e-07
ZDHHC9	zinc finger DHHC-type containing 9	1.07842	1.42e-05
HP	haptoglobin	1.08104	9.29e-07
TRIB2	tribbles pseudokinase 2	1.08485	1.65e-05
ZMYM6	zinc finger MYM-type containing 6	1.08777	6.47e-07
ENPP4	ectonucleotide pyrophosphatase/phosphodiesterase 4 (putative)	1.08863	4.1e-06
CYB5A	cytochrome b5 type A	1.08876	8.62e-06
FAM3C	family with sequence similarity 3 member C	1.08909	1.61e-06
KIF13B	kinesin family member 13B	1.08996	1.56e-06
IFI6	interferon alpha inducible protein 6	1.09092	0.00016
CALCOCO2	calcium binding and coiled-coil domain 2	1.09283	1.17e-05
STOM	stomatin	1.09613	5.99e-06
CTSB	cathepsin B	1.09781	5.75e-05
MT1A	metallothionein 1A	1.09962	4.46e-07
KLHL24	kelch like family member 24	1.10048	4.03e-07
CDKN2B	cyclin dependent kinase inhibitor 2B	1.10167	1.9e-07
WISP3	WNT1 inducible signaling pathway protein 3	1.10309	2.17e-07
JAM2	junctional adhesion molecule 2	1.10596	1.29e-05
TGFBR2	transforming growth factor beta receptor 2	1.1072	3.97e-07
GLMP	glycosylated lysosomal membrane protein	1.11047	5.67e-07
TNFRSF11B	TNF receptor superfamily member 11b	1.11075	0.000166
AHCY	adenosylhomocysteinase	1.11169	3.16e-05
MYLIP	myosin regulatory light chain interacting protein	1.11507	1.46e-05
AGTR1	angiotensin II receptor type 1	1.11519	2.35e-05
GRN	granulin	1.12137	4.31e-05
TCEAL1	transcription elongation factor A like 1	1.12351	1.88e-05
PDGFRA	platelet derived growth factor receptor alpha	1.12403	0.000164
ZFP36L2	ZFP36 ring finger protein like 2	1.12411	4.92e-06
FAM43A	family with sequence similarity 43 member A	1.12421	9.89e-06
DLX5	distal-less homeobox 5	1.12795	3.97e-07
FAXDC2	fatty acid hydroxylase domain containing 2	1.12956	3.66e-07
CRLF1	cytokine receptor like factor 1	1.13165	7.06e-08
EGR2	early growth response 2	1.1349	1.54e-06
EIF4A2	eukaryotic translation initiation factor 4A2	1.13784	4.53e-08
STON1	stonin 1	1.14133	2e-07
PCOLCE	procollagen C-endopeptidase enhancer	1.14185	1.4e-06
NHLRC3	NHL repeat containing 3	1.14502	1.64e-06
PAM	peptidylglycine alpha-amidating monooxygenase	1.14871	1.85e-05
CST3	cystatin C	1.14971	2.94e-06
KDSR	3-ketodihydrosphingosine reductase	1.15532	1.01e-06
SDCBP	syndecan binding protein	1.15574	1.87e-06
S100A13	S100 calcium binding protein A13	1.15639	5.74e-06
RCBTB2	RCC1 and BTB domain containing protein 2	1.16045	1.92e-06
TBCK	TBC1 domain containing kinase	1.16207	4.5e-07
GADD45A	growth arrest and DNA damage inducible alpha	1.16611	1.05e-06
LAYN	layilin	1.17006	4.68e-06
ISCU	iron-sulfur cluster assembly enzyme	1.17188	2.75e-05
ANKRD33	ankyrin repeat domain 33	1.17412	3.83e-07
CCDC68	coiled-coil domain containing 68	1.17439	5.21e-06
NFKBIA	NFKB inhibitor alpha	1.17655	1.66e-06
CDH11	cadherin 11	1.17673	9.52e-06
AKAP13	A-kinase anchoring protein 13	1.1858	2.33e-06
YPEL2	yippee like 2	1.18693	2.31e-07
LPL	lipoprotein lipase	1.18729	2.18e-06
RGMA	repulsive guidance molecule family member a	1.18983	7.66e-07
TSPAN18	tetraspanin 18	1.19106	2.77e-06
APOB	apolipoprotein B	1.19639	2.67e-06
FASN	fatty acid synthase	1.19773	5.81e-05
HCFC1R1	host cell factor C1 regulator 1	1.20191	2.16e-05
PPFIBP2	PPFIA binding protein 2	1.20482	1.77e-06
IFI44L	interferon induced protein 44 like	1.20646	1.43e-06
ANGPTL4	angiopoietin like 4	1.20765	3.06e-06
SSH2	slingshot protein phosphatase 2	1.20766	5.42e-08
GLS	glutaminase	1.2099	5.05e-07
NBL1	neuroblastoma 1, DAN family BMP antagonist	1.21019	5.81e-07
SMPDL3A	sphingomyelin phosphodiesterase acid like 3A	1.21029	1.04e-06
ACTA2	actin, alpha 2, smooth muscle, aorta	1.21183	5.21e-06
GBE1	glucan (1,4-alpha-), branching enzyme 1	1.21221	4.34e-07
PTGFR	prostaglandin F receptor	1.21439	1.92e-06
ERP27	endoplasmic reticulum protein 27	1.21447	1.82e-07
SNAI2	snail family transcriptional repressor 2	1.21837	3.52e-06
RHOBTB3	Rho related BTB domain containing 3	1.22191	5.14e-05
AKR1C2	aldo-keto reductase family 1, member C2	1.22317	6.17e-05
CMTM4	CKLF like MARVEL transmembrane domain containing 4	1.22323	3.93e-06
TMEM100	transmembrane protein 100	1.23329	2.25e-06
SPATA18	spermatogenesis associated 18	1.23347	7.29e-06
IL17D	interleukin 17D	1.23413	3.15e-05
NNMT	nicotinamide N-methyltransferase	1.23435	1.35e-06
HIST1H2BD	histone cluster 1, H2bd	1.23512	4.92e-06
ZCCHC24	zinc finger CCHC-type containing 24	1.2382	3.02e-06
KLF9	Kruppel like factor 9	1.24317	1.82e-06
CDO1	cysteine dioxygenase type 1	1.24469	3.7e-06
FTH1P3	ferritin heavy chain 1 pseudogene 3	1.25493	6.97e-05
TYMP	thymidine phosphorylase	1.25653	1.18e-07
HEXB	hexosaminidase subunit beta	1.25847	5.39e-07
RECK	reversion inducing cysteine rich protein with kazal motifs	1.25871	1.97e-06
PDXK	pyridoxal (pyridoxine, vitamin B6) kinase	1.26635	1.18e-07
CTSH	cathepsin H	1.27272	1.25e-06
SUSD2	sushi domain containing 2	1.27326	4.41e-07
TGFBR3	transforming growth factor beta receptor 3	1.27376	6.85e-07
PRUNE2	prune homolog 2	1.27386	7.81e-08
RRAS	related RAS viral (r-ras) oncogene homolog	1.2781	9.43e-07
GADD45B	growth arrest and DNA damage inducible beta	1.2785	2.42e-07
EPS8	epidermal growth factor receptor pathway substrate 8	1.2788	8.09e-07
ACSS2	acyl-CoA synthetase short-chain family member 2	1.28023	2.84e-07
PLAC9	placenta specific 9	1.2805	1.49e-06
TWIST1	twist family bHLH transcription factor 1	1.2821	7.65e-08
MAMDC2	MAM domain containing 2	1.2821	3.93e-06
ZNF385B	zinc finger protein 385B	1.29574	1.48e-07
ITGA1	integrin subunit alpha 1	1.29895	1.14e-05
HIST1H2AC	histone cluster 1, H2ac	1.30145	3.45e-07
GBP2	guanylate binding protein 2	1.3023	2.52e-08
PLA2G16	phospholipase A2 group XVI	1.30337	3.01e-06
ADRA1B	adrenoceptor alpha 1B	1.30515	2.92e-07
SH3BGRL	SH3 domain binding glutamate rich protein like	1.30703	3.48e-07
AKR1C3	aldo-keto reductase family 1, member C3	1.30823	5.38e-05
ITPR1	inositol 1,4,5-trisphosphate receptor type 1	1.30872	4.74e-08
WASF3	WAS protein family member 3	1.31535	4.24e-07
SLC44A2	solute carrier family 44 member 2	1.31778	7.02e-07
DKK1	dickkopf WNT signaling pathway inhibitor 1	1.32333	1.45e-05
TNFAIP8L3	TNF alpha induced protein 8 like 3	1.32495	2.46e-08
DHCR24	24-dehydrocholesterol reductase	1.3303	1.14e-06
OSBPL10	oxysterol binding protein like 10	1.33039	7.33e-07
ARHGEF6	Rac/Cdc42 guanine nucleotide exchange factor 6	1.33118	1.8e-08
ARL6IP5	ADP ribosylation factor like GTPase 6 interacting protein 5	1.33185	0.00122
GPD1L	glycerol-3-phosphate dehydrogenase 1-like	1.33606	4.8e-06
SORBS2	sorbin and SH3 domain containing 2	1.33852	6.88e-06
COL12A1	collagen type XII alpha 1 chain	1.34538	4.7e-07
EVI2A	ecotropic viral integration site 2A	1.35135	3.59e-05
SLC2A10	solute carrier family 2 member 10	1.356	1.04e-06
ALDH6A1	aldehyde dehydrogenase 6 family member A1	1.35741	1.14e-07
TPP1	tripeptidyl peptidase 1	1.37074	1.28e-06
CTNNB1	catenin beta 1	1.37156	5.17e-07
MXD4	MAX dimerization protein 4	1.37554	1.85e-06
RPS29	ribosomal protein S29	1.37619	8.89e-07
ROR2	receptor tyrosine kinase like orphan receptor 2	1.38	4.4e-08
ACSL1	acyl-CoA synthetase long-chain family member 1	1.38383	2.12e-06
CHST7	carbohydrate sulfotransferase 7	1.3849	6.88e-08
HSPB1	heat shock protein family B (small) member 1	1.38648	1.38e-05
PIK3IP1	phosphoinositide-3-kinase interacting protein 1	1.39075	3.63e-06
CPQ	carboxypeptidase Q	1.39096	5.01e-07
ANGPTL5	angiopoietin like 5	1.39744	1.13e-06
VEGFB	vascular endothelial growth factor B	1.39939	4.45e-08
LHFP	lipoma HMGIC fusion partner	1.40521	3.58e-06
ZMAT3	zinc finger matrin-type 3	1.41187	8.07e-07
TFPI	tissue factor pathway inhibitor	1.41547	7.41e-08
SMOC2	SPARC related modular calcium binding 2	1.4164	4.8e-05
SETMAR	SET domain and mariner transposase fusion gene	1.41732	6.14e-08
FAM89A	family with sequence similarity 89 member A	1.41881	7.66e-07
SPON1	spondin 1	1.42054	3.47e-07
ANG	angiogenin	1.42129	2.12e-07
MFGE8	milk fat globule-EGF factor 8 protein	1.43002	1.44e-07
QPRT	quinolinate phosphoribosyltransferase	1.4315	1.55e-06
GLT8D2	glycosyltransferase 8 domain containing 2	1.43402	3.78e-08
KCNS3	potassium voltage-gated channel modifier subfamily S member 3	1.43461	1.73e-07
TPR	translocated promoter region, nuclear basket protein	1.4434	6.66e-07
GSN	gelsolin	1.45921	4.61e-06
TTPAL	alpha tocopherol transfer protein like	1.46543	1.15e-07
NEDD9	neural precursor cell expressed, developmentally down-regulated 9	1.46752	4.16e-07
HPS5	HPS5, biogenesis of lysosomal organelles complex 2 subunit 2	1.47	1.36e-07
FCGRT	Fc fragment of IgG receptor and transporter	1.47237	1.58e-07
HIST1H2BK	histone cluster 1, H2bk	1.47588	6.49e-06
GPR89B	G protein-coupled receptor 89B	1.47896	2.9e-07
SLC25A23	solute carrier family 25 member 23	1.47997	2.88e-08
TCEAL3	transcription elongation factor A like 3	1.4803	4.22e-07
THBS2	thrombospondin 2	1.48387	2.05e-06
INSIG2	insulin induced gene 2	1.4839	1.16e-06
ZFP36	ZFP36 ring finger protein	1.48518	3.74e-05
OPTN	optineurin	1.48979	1.58e-07
CCL13	C-C motif chemokine ligand 13	1.48988	2.04e-08
ITGB5	integrin subunit beta 5	1.49392	8.52e-09
METTL7A	methyltransferase like 7A	1.49933	8.07e-07
COLGALT2	collagen beta(1-O)galactosyltransferase 2	1.50097	2.67e-07
CMTM3	CKLF like MARVEL transmembrane domain containing 3	1.50772	2.03e-07
STAT5A	signal transducer and activator of transcription 5A	1.5135	1.96e-07
HTRA1	HtrA serine peptidase 1	1.51477	2.46e-08
ENDOD1	endonuclease domain containing 1	1.52329	1.01e-06
FOS	Fos proto-oncogene, AP-1 transcription factor subunit	1.52347	8.51e-08
PTGER2	prostaglandin E receptor 2	1.52365	7.57e-08
PPP1R3C	protein phosphatase 1 regulatory subunit 3C	1.52414	4.17e-07
APCDD1	APC down-regulated 1	1.52774	1.01e-05
IFITM1	interferon induced transmembrane protein 1	1.53108	1.41e-07
PTGIS	prostaglandin I2 (prostacyclin) synthase	1.54311	2.17e-08
RERG	RAS like estrogen regulated growth inhibitor	1.54856	6.46e-07
FAP	fibroblast activation protein alpha	1.55033	5.92e-08
FMOD	fibromodulin	1.55315	1.54e-06
ST6GAL1	ST6 beta-galactoside alpha-2,6-sialyltransferase 1	1.55744	7.65e-08
COX7A1	cytochrome c oxidase subunit 7A1	1.55934	2.07e-06
OPN3	opsin 3	1.56481	2.23e-07
PTN	pleiotrophin	1.56867	1.35e-08
FMO2	flavin containing monooxygenase 2	1.57004	4.57e-07
MT1M	metallothionein 1M	1.57491	2.44e-07
CTSD	cathepsin D	1.57669	5.6e-08
RENBP	renin binding protein	1.57812	4.22e-08
PDGFRB	platelet derived growth factor receptor beta	1.58389	1.23e-07
FOXO3	forkhead box O3	1.58441	3.77e-07
ANKRD35	ankyrin repeat domain 35	1.59696	1.02e-08
OLFML2B	olfactomedin like 2B	1.60614	1.84e-07
AFAP1L1	actin filament associated protein 1 like 1	1.60656	1.37e-08
PCDH18	protocadherin 18	1.60935	1.21e-08
SH3D19	SH3 domain containing 19	1.62449	1.18e-07
RNASE4	ribonuclease A family member 4	1.63032	1.16e-07
WISP1	WNT1 inducible signaling pathway protein 1	1.63384	1.16e-06
REPS2	RALBP1 associated Eps domain containing 2	1.63475	2.19e-08
PRKD1	protein kinase D1	1.6356	3.66e-08
ABCC3	ATP binding cassette subfamily C member 3	1.64314	1.43e-07
CRYAB	crystallin alpha B	1.64435	2.07e-08
LEPROT	leptin receptor overlapping transcript	1.64447	4.37e-06
PIK3R1	phosphoinositide-3-kinase regulatory subunit 1	1.64513	4.37e-06
ARRDC2	arrestin domain containing 2	1.6462	4.44e-06
SLC7A8	solute carrier family 7 member 8	1.65563	6.59e-08
SERPINA3	serpin family A member 3	1.66225	1.55e-07
PMP22	peripheral myelin protein 22	1.66687	8.95e-09
CYGB	cytoglobin	1.67241	7.81e-09
IFNGR1	interferon gamma receptor 1	1.6735	1.57e-08
TCEAL4	transcription elongation factor A like 4	1.67582	6.2e-07
ALPL	alkaline phosphatase, liver/bone/kidney	1.67771	2.77e-08
PRELP	proline and arginine rich end leucine rich repeat protein	1.6781	9.04e-08
SLC44A1	solute carrier family 44 member 1	1.68029	3.23e-08
PCSK5	proprotein convertase subtilisin/kexin type 5	1.68406	3.53e-07
SFRP1	secreted frizzled related protein 1	1.68462	6.48e-09
SLC11A2	solute carrier family 11 member 2	1.70269	1.45e-07
NEXN	nexilin F-actin binding protein	1.70799	9.89e-08
IMPA2	inositol monophosphatase 2	1.71338	4.45e-08
C1R	complement C1r subcomponent	1.7232	2.86e-08
DCLK1	doublecortin like kinase 1	1.72354	2.89e-09
MMD	monocyte to macrophage differentiation associated	1.72391	4.04e-07
F2R	coagulation factor II thrombin receptor	1.73508	2.32e-06
SLC35F5	solute carrier family 35 member F5	1.73894	7.09e-07
TEX2	testis expressed 2	1.74119	1.03e-06
VIT	vitrin	1.74706	6.56e-08
SCD	stearoyl-CoA desaturase	1.75755	6.89e-08
ADCY3	adenylate cyclase 3	1.75772	3.87e-08
CEBPD	CCAAT/enhancer binding protein delta	1.76703	1.77e-08
PTPRM	protein tyrosine phosphatase, receptor type M	1.77893	1.14e-07
C1S	complement component 1, s subcomponent	1.7875	7.01e-07
ISM1	isthmin 1, angiogenesis inhibitor	1.78882	2.93e-07
STAT2	signal transducer and activator of transcription 2	1.7914	1.01e-07
ARHGDIB	Rho GDP dissociation inhibitor beta	1.79647	8.5e-06
WISP2	WNT1 inducible signaling pathway protein 2	1.80457	4.27e-08
RGS2	regulator of G-protein signaling 2	1.80887	8.87e-09
LMCD1	LIM and cysteine rich domains 1	1.83008	1.47e-05
NR2F1	nuclear receptor subfamily 2 group F member 1	1.84513	4.02e-08
ZNF106	zinc finger protein 106	1.84961	1.93e-08
SOD2	superoxide dismutase 2, mitochondrial	1.85367	2.44e-07
BCL6	B-cell CLL/lymphoma 6	1.854	1.07e-07
ABCA6	ATP binding cassette subfamily A member 6	1.87759	9.32e-08
NINJ2	ninjurin 2	1.89603	6.89e-08
CTHRC1	collagen triple helix repeat containing 1	1.89678	5.45e-08
CERS6	ceramide synthase 6	1.89858	3.41e-08
CD302	CD302 molecule	1.90052	5.13e-08
PODN	podocan	1.91238	1.03e-08
SERPING1	serpin family G member 1	1.91472	5.03e-07
PDE1A	phosphodiesterase 1A	1.93081	4.04e-09
TRNP1	TMF1-regulated nuclear protein 1	1.9329	1.29e-07
C1QTNF1	C1q and tumor necrosis factor related protein 1	1.93359	5.6e-08
GAS6	growth arrest specific 6	1.93449	1.18e-07
IGF2	insulin like growth factor 2	1.94144	8.95e-09
CCDC3	coiled-coil domain containing 3	1.94149	1.56e-09
SRPX2	sushi repeat containing protein, X-linked 2	1.95652	5.13e-07
SEPP1	selenoprotein P, plasma, 1	1.97186	6.04e-09
TMEM140	transmembrane protein 140	1.97356	3.97e-08
RPS6KA2	ribosomal protein S6 kinase A2	1.98049	1.46e-08
IRS2	insulin receptor substrate 2	1.98902	1.66e-07
ABCA8	ATP binding cassette subfamily A member 8	1.99413	1.67e-07
ADM	adrenomedullin	1.99651	4.48e-08
TMEM119	transmembrane protein 119	1.99668	6.2e-08
MOXD1	monooxygenase DBH like 1	2.00346	6.89e-08
MTSS1	metastasis suppressor 1	2.00657	1.26e-07
GABARAPL1	GABA type A receptor associated protein like 1	2.01172	1.34e-08
OLFML3	olfactomedin like 3	2.03836	1.83e-07
TNC	tenascin C	2.03924	1.38e-06
GPC4	glypican 4	2.04621	2.8e-08
POSTN	periostin	2.0516	2.74e-07
CD24	CD24 molecule	2.05743	2.88e-08
SCPEP1	serine carboxypeptidase 1	2.06205	3.09e-08
TXNIP	thioredoxin interacting protein	2.07248	5.48e-07
HSD11B1	hydroxysteroid 11-beta dehydrogenase 1	2.07754	1.38e-07
SORT1	sortilin 1	2.08119	2.91e-09
KCNT2	potassium sodium-activated channel subfamily T member 2	2.08127	3.81e-09
CADM3	cell adhesion molecule 3	2.08367	8.6e-07
PIP	prolactin induced protein	2.08718	2.46e-08
PLXDC2	plexin domain containing 2	2.09376	7.41e-08
PDGFD	platelet derived growth factor D	2.09447	2.12e-09
MAN1C1	mannosidase alpha class 1C member 1	2.09757	1.14e-07
PLSCR4	phospholipid scramblase 4	2.10831	1.01e-07
RFTN2	raftlin family member 2	2.11652	2.04e-08
FZD4	frizzled class receptor 4	2.19047	4.67e-10
C1QTNF5	C1q and tumor necrosis factor related protein 5	2.207	4.08e-07
MYO1D	myosin ID	2.25949	1.39e-08
TMEM204	transmembrane protein 204	2.26202	1.5e-09
LUM	lumican	2.29268	4.59e-07
CAMK2N1	calcium/calmodulin dependent protein kinase II inhibitor 1	2.29627	3.96e-09
FBLN2	fibulin 2	2.29869	1.8e-09
COL8A2	collagen type VIII alpha 2 chain	2.30602	7.76e-08
AEBP1	AE binding protein 1	2.33115	7.28e-08
ECM2	extracellular matrix protein 2	2.36343	1.1e-07
COL7A1	collagen type VII alpha 1 chain	2.36404	5.58e-08
ZBTB16	zinc finger and BTB domain containing 16	2.37261	3.68e-09
SAT1	spermidine/spermine N1-acetyltransferase 1	2.40598	4.2e-08
SPARCL1	SPARC like 1	2.41097	4.67e-10
DCN	decorin	2.44099	2.91e-08
GPNMB	glycoprotein nmb	2.45017	4.83e-08
TMTC1	transmembrane and tetratricopeptide repeat containing 1	2.4687	5.6e-08
SERPINF1	serpin family F member 1	2.47158	3.68e-09
FBN2	fibrillin 2	2.47605	1.29e-07
GCHFR	GTP cyclohydrolase I feedback regulator	2.49268	2.18e-08
GAS1	growth arrest specific 1	2.49735	6.92e-08
RANBP3L	RAN binding protein 3 like	2.50607	1.44e-10
TNS3	tensin 3	2.51584	8.8e-09
RAB31	RAB31, member RAS oncogene family	2.52161	8.83e-10
OSBPL5	oxysterol binding protein like 5	2.53438	5.01e-10
COL10A1	collagen type X alpha 1 chain	2.53691	1.31e-09
CCND2	cyclin D2	2.54087	5.31e-10
ITGA10	integrin subunit alpha 10	2.56109	6.26e-09
PTGDS	prostaglandin D2 synthase	2.56829	1.31e-09
DDIT4	DNA damage inducible transcript 4	2.58787	1.52e-08
CYBRD1	cytochrome b reductase 1	2.59612	1.81e-09
AOX1	aldehyde oxidase 1	2.67182	3.12e-09
FBLN5	fibulin 5	2.68384	6.68e-10
APOE	apolipoprotein E	2.71196	6.03e-09
PPARG	peroxisome proliferator activated receptor gamma	2.72436	8.1e-10
DPT	dermatopontin	2.74474	2.28e-09
SVEP1	sushi, von Willebrand factor type A, EGF and pentraxin domain containing 1	2.78565	3.12e-09
ADARB1	adenosine deaminase, RNA specific B1	2.79845	6.68e-10
PPP1R14A	protein phosphatase 1 regulatory inhibitor subunit 14A	2.80655	2.1e-09
SPRY1	sprouty RTK signaling antagonist 1	2.82437	3.95e-10
EFHD1	EF-hand domain family member D1	2.82803	3.68e-09
DUSP23	dual specificity phosphatase 23	2.84426	5.49e-10
MFAP4	microfibrillar associated protein 4	2.8573	3.9e-10
CMTM8	CKLF like MARVEL transmembrane domain containing 8	2.8585	5.31e-10
PDGFRL	platelet derived growth factor receptor like	2.87543	2.1e-09
SAA1	serum amyloid A1	2.94131	2.67e-09
COL8A1	collagen type VIII alpha 1 chain	2.94238	5.31e-10
LAMA2	laminin subunit alpha 2	2.95445	1.32e-09
IGFBP2	insulin like growth factor binding protein 2	2.95748	1.02e-08
FOXO1	forkhead box O1	2.95842	1.16e-09
PROS1	protein S (alpha)	3.04982	4.67e-10
RASD1	ras related dexamethasone induced 1	3.0527	1.04e-09
ANGPT1	angiopoietin 1	3.05772	9.94e-11
SLC46A3	solute carrier family 46 member 3	3.08091	3.85e-09
C10orf10	chromosome 10 open reading frame 10	3.09537	1.41e-07
FMO3	flavin containing monooxygenase 3	3.10356	3.9e-10
CFH	complement factor H	3.12819	5.31e-10
ADH1B	alcohol dehydrogenase 1B (class I), beta polypeptide	3.14885	4.67e-10
CTSK	cathepsin K	3.18323	2.74e-09
SRPX	sushi repeat containing protein, X-linked	3.21218	5.95e-10
TIMP4	TIMP metallopeptidase inhibitor 4	3.22242	7.47e-10
CD14	CD14 molecule	3.26772	5.49e-10
OMD	osteomodulin	3.38605	4.79e-10
RAP2A	RAP2A, member of RAS oncogene family	3.43963	2.67e-09
SLC40A1	solute carrier family 40 member 1	3.45866	9.94e-11
GPM6B	glycoprotein M6B	3.48052	2.37e-09
TSC22D3	TSC22 domain family member 3	3.49192	8.99e-11
CORIN	corin, serine peptidase	3.63604	5.49e-10
MMP7	matrix metallopeptidase 7	3.72801	8.18e-12
CFD	complement factor D	3.74868	5.99e-10
LEPR	leptin receptor	3.75769	3.04e-09
MT1X	metallothionein 1X	3.75828	1.94e-10
COMP	cartilage oligomeric matrix protein	3.76923	2.71e-09
TACSTD2	tumor-associated calcium signal transducer 2	3.79026	2.11e-08
OLFML2A	olfactomedin like 2A	3.8243	3.68e-09
RGCC	regulator of cell cycle	3.92071	6.67e-10
CIDEC	cell death inducing DFFA like effector c	3.96913	9.94e-11
FBXO32	F-box protein 32	4.04948	7.35e-10
MME	membrane metallo-endopeptidase	4.1029	1.43e-08
FBLN1	fibulin 1	4.11212	5.01e-10
FKBP5	FK506 binding protein 5	4.1657	3.22e-11
MAOA	monoamine oxidase A	4.17798	9.94e-11
STMN2	stathmin 2	4.23362	3.22e-11
LEP	leptin	4.24519	9.85e-10
HOPX	HOP homeobox	4.29411	6.67e-10
FRZB	frizzled-related protein	4.84092	5.31e-10
ADH1A	alcohol dehydrogenase 1A (class I), alpha polypeptide	5.23234	1.61e-12
GPX3	glutathione peroxidase 3	5.24177	8.18e-12
COL11A1	collagen type XI alpha 1 chain	5.29711	8.61e-12
MGP	matrix Gla protein	5.37121	1.98e-12
APOD	apolipoprotein D	7.5807	2.69e-13
